# Supplementary material for: Intramolecular Nicholas Reaction Enables the Stereoselective Synthesis of Strained Cyclooctynes
Source: MDPI journal article supplement (doi:10.3390/molecules26061629), 2021-03-15
Supplement: s1 [file s1]

# ***Supporting Information***

## **Intramolecular Nicholas Reaction Enables the Synthesis of Strained Cyclooctynes**

Diego Manuel Monzón, Juan Manuel Betancort, Tomás Martín, Miguel Ángel Ramírez, Víctor S. Martín\*  
and David Díaz Díaz\*

## NMR spectra of compounds

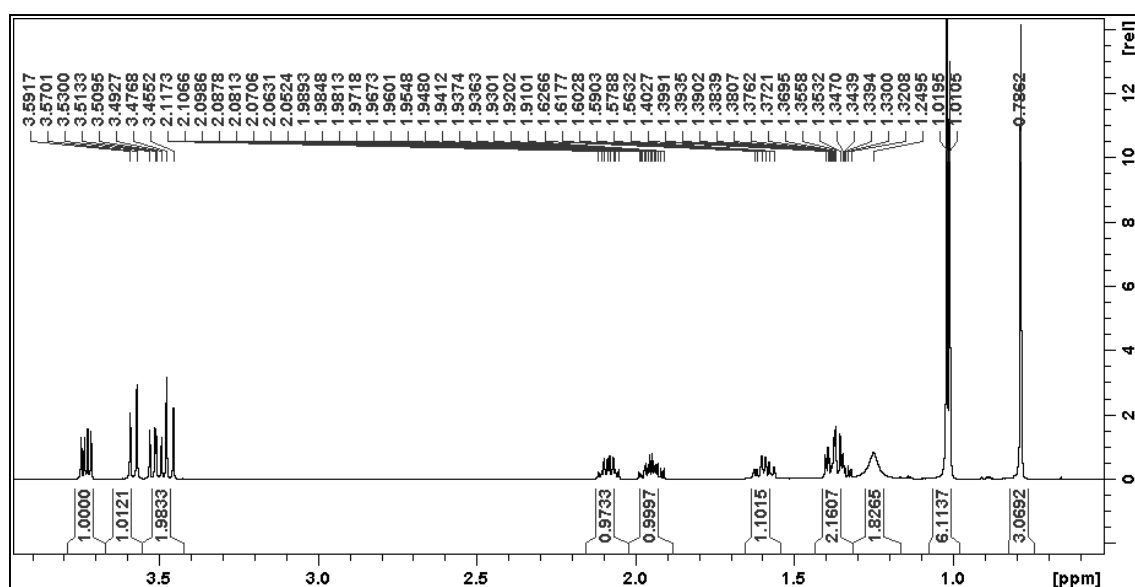

Figure S1.  $^1\text{H}$  NMR spectrum of compound 2

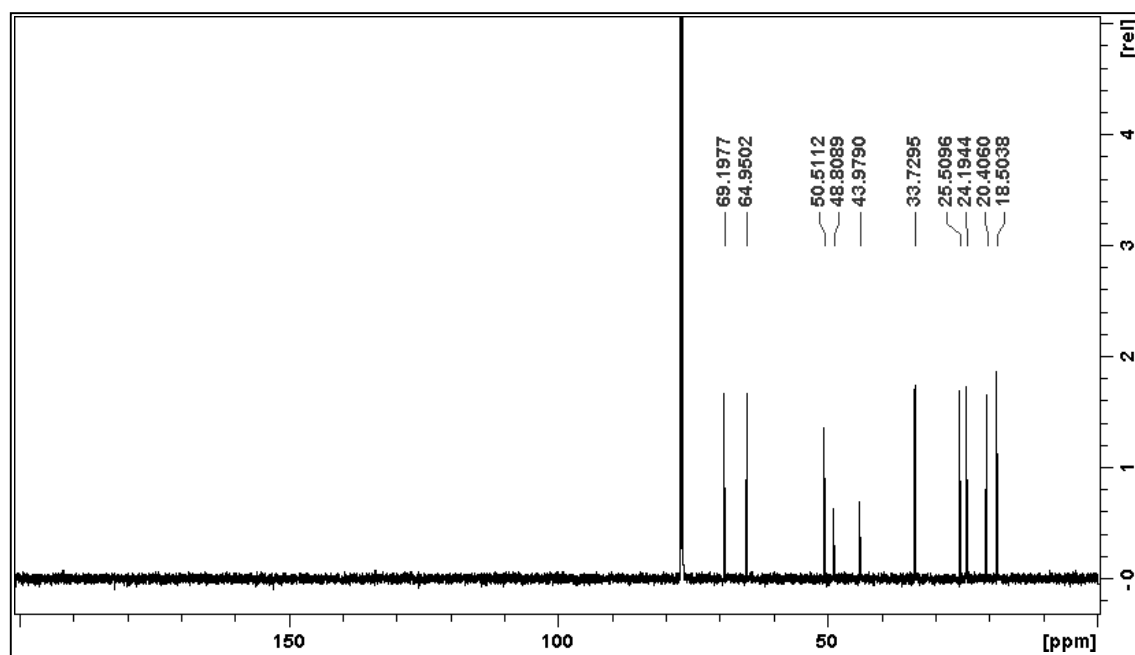

Figure S2.  $^{13}\text{C}$  NMR spectrum of compound 2

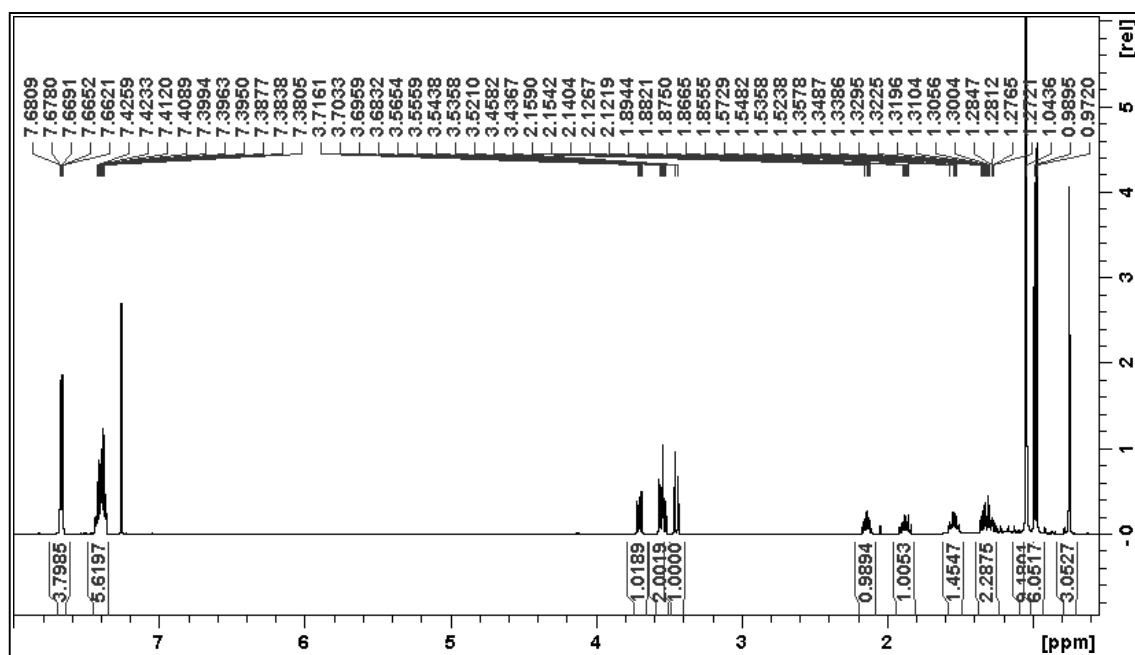

Figure S3. <sup>1</sup>H NMR spectrum of compound 3

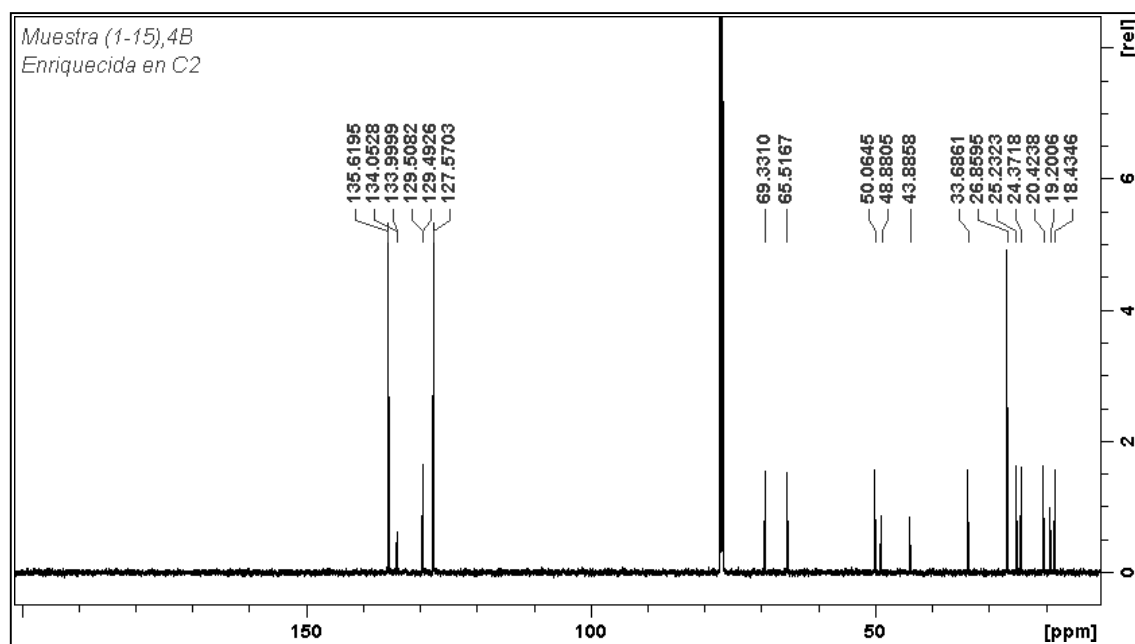

Figure S4. <sup>13</sup>C NMR spectrum of compound 3

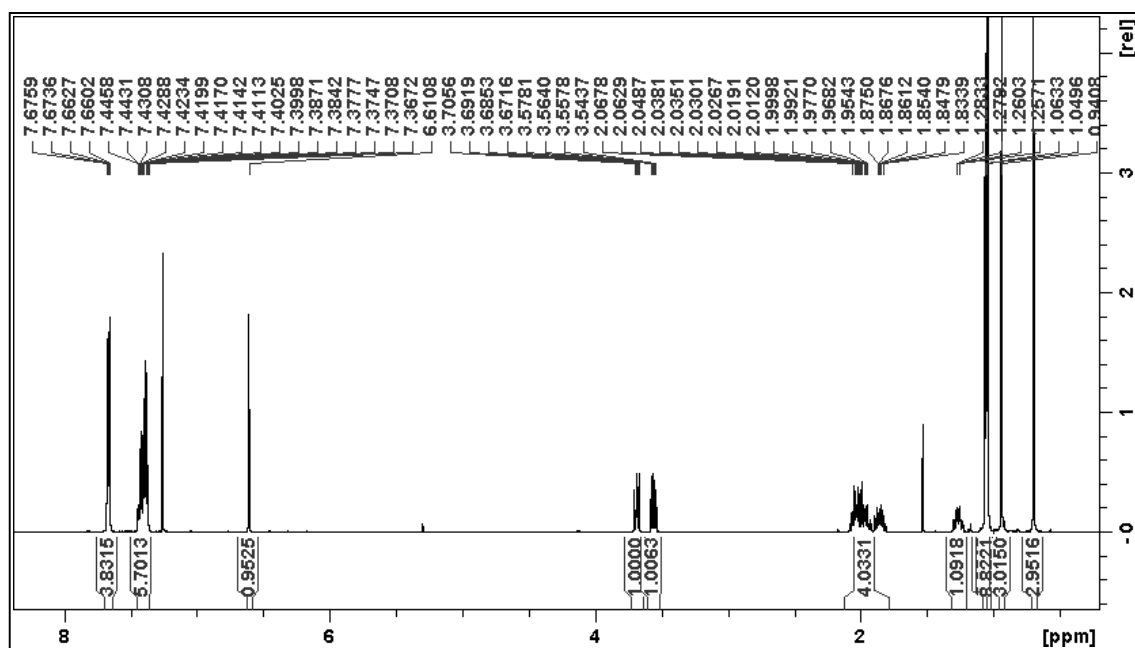

Figure S5.  $^1\text{H}$  NMR spectrum of compound 4

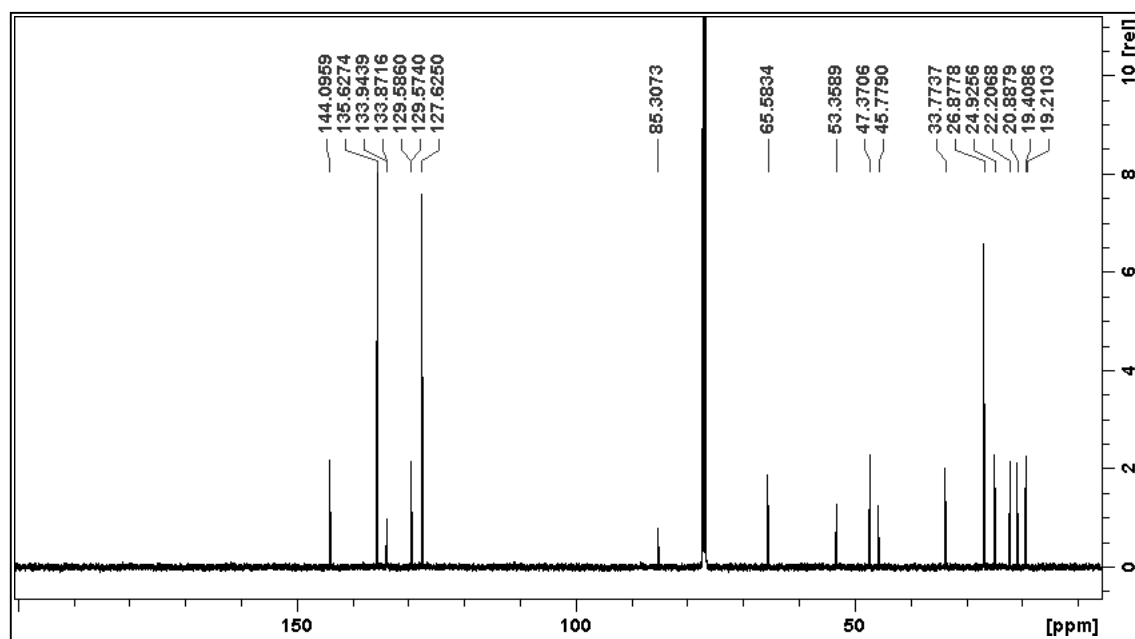

Figure S6.  $^{13}\text{C}$  NMR spectrum of compound 4

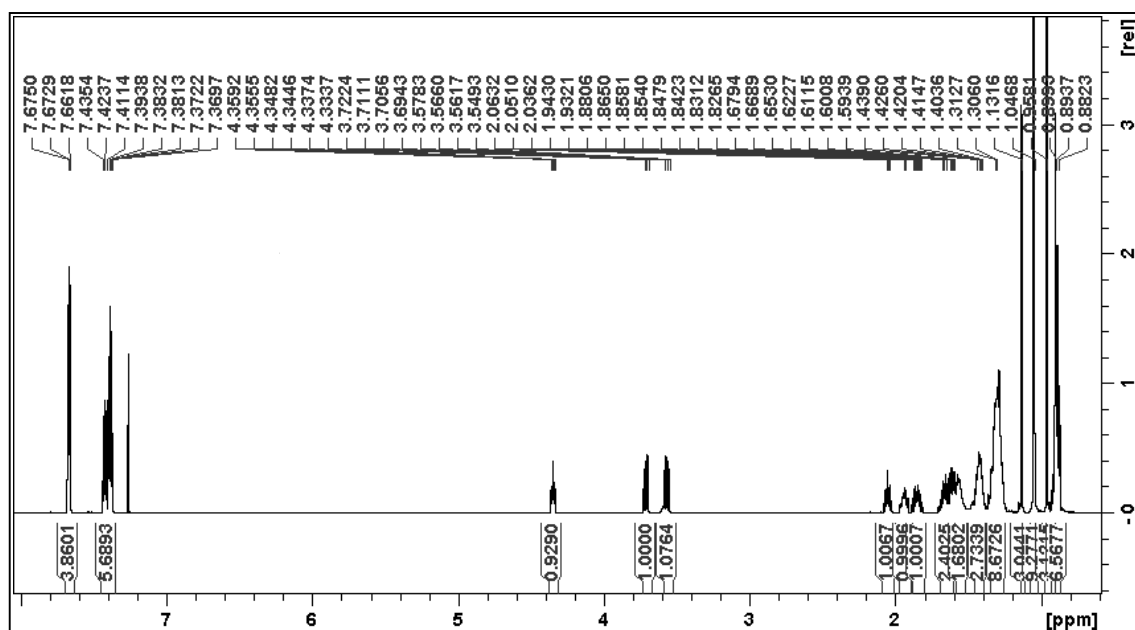

Figure S7. <sup>1</sup>H NMR spectrum of compound 5

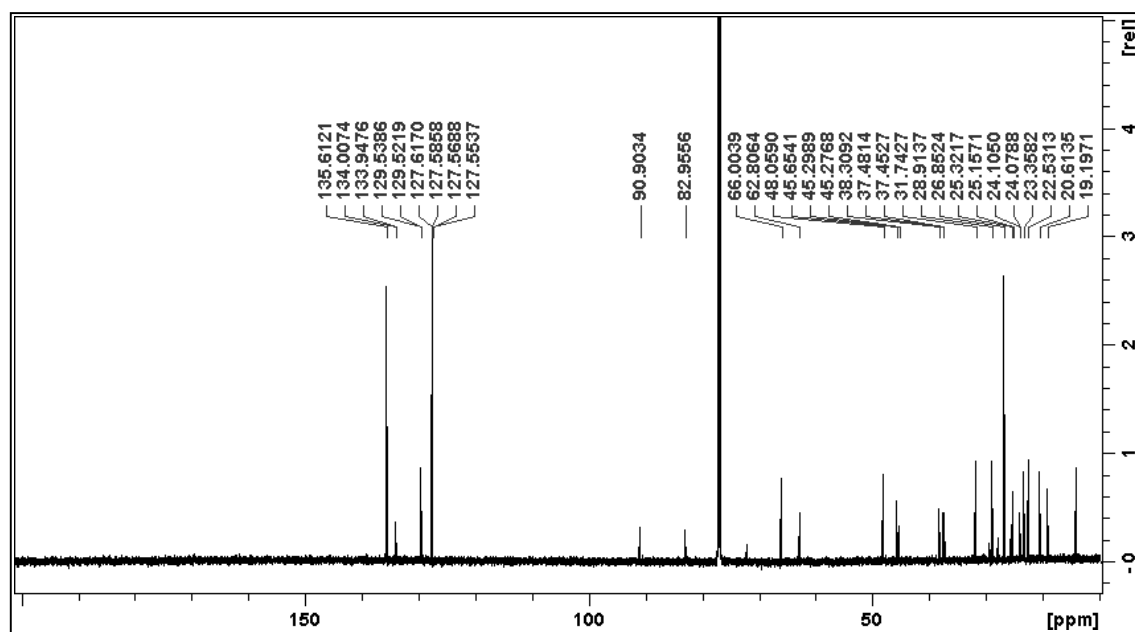

Figure S8. <sup>13</sup>C NMR spectrum of compound 5

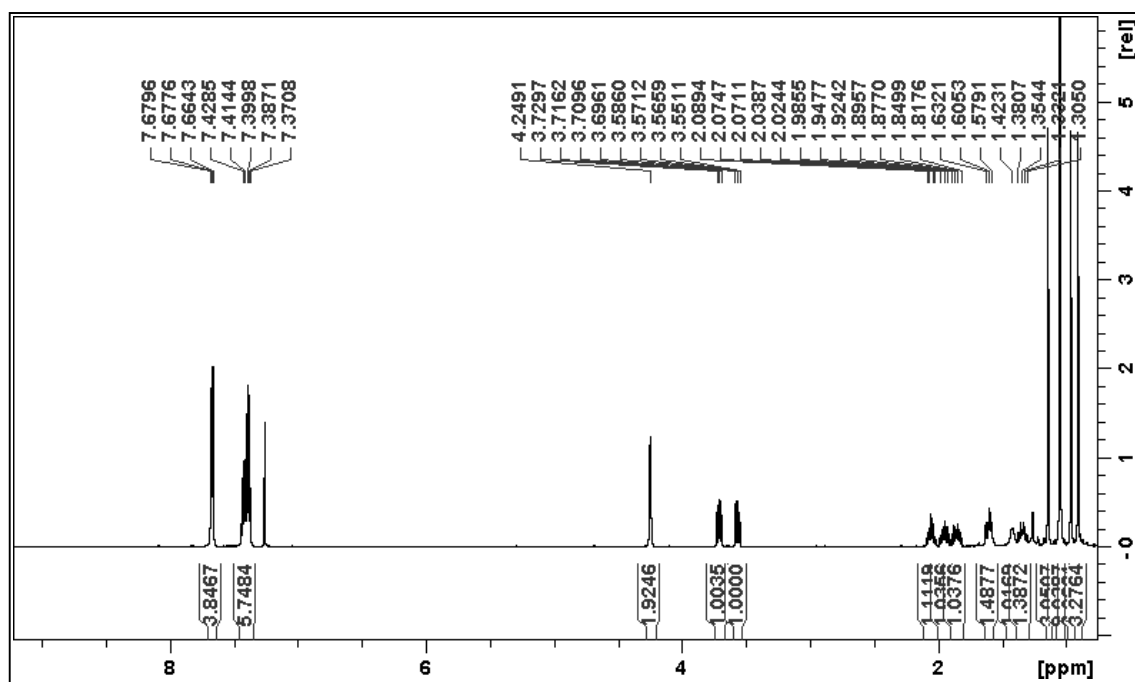

Figure S9. <sup>1</sup>H NMR spectrum of compound 6

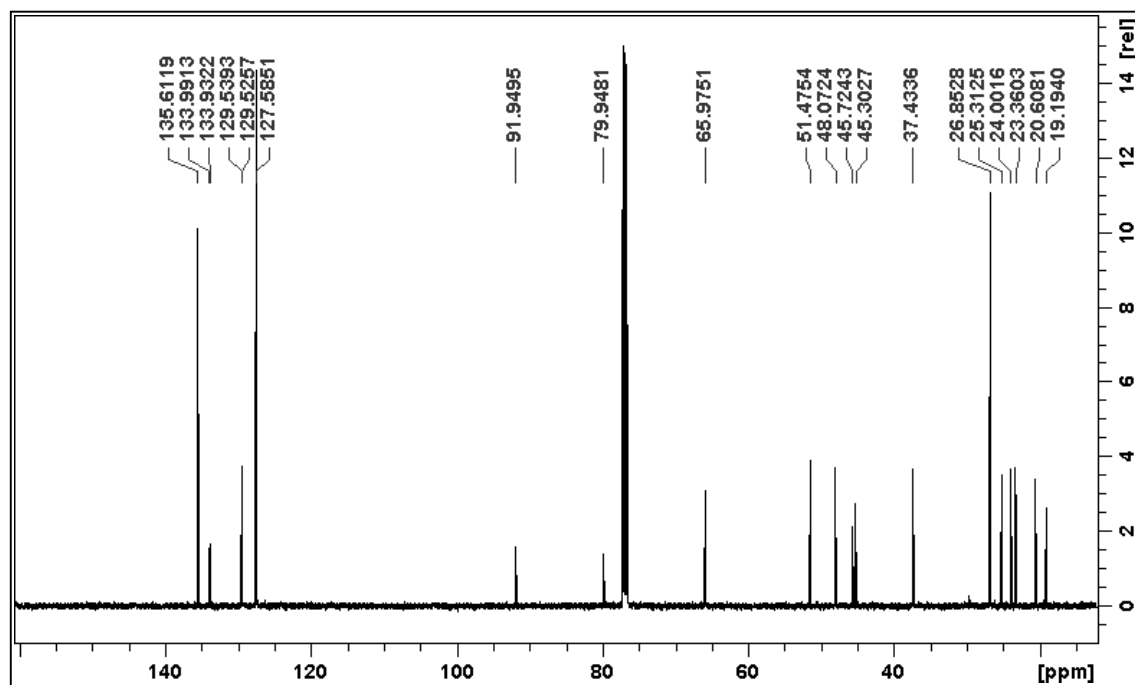

Figure S10. <sup>13</sup>C NMR spectrum of compound 6

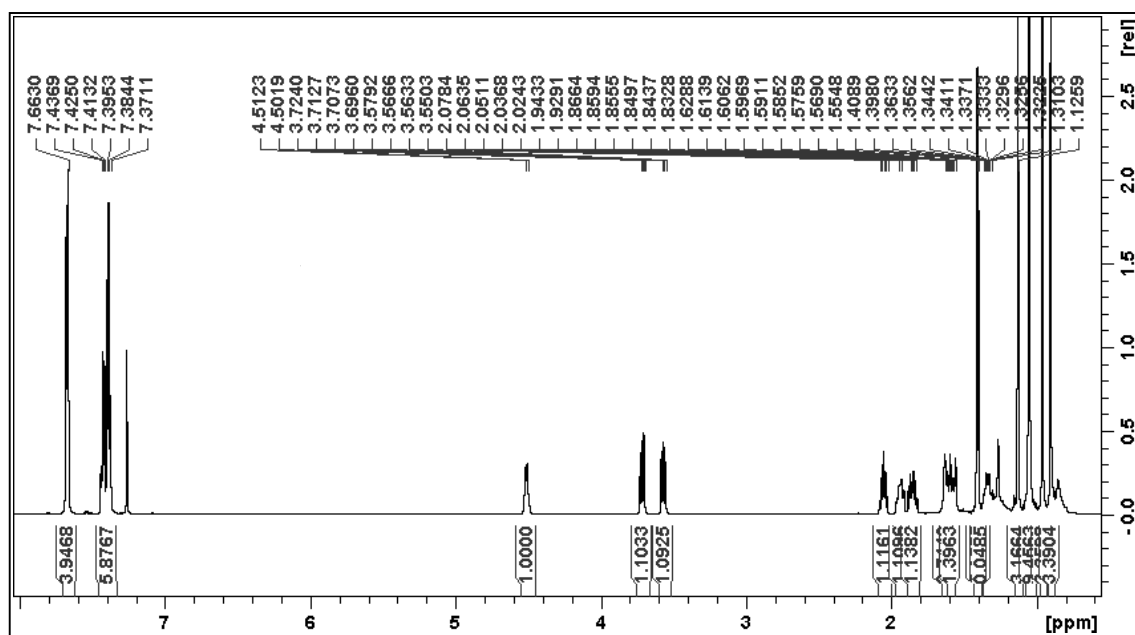

Figure S11. <sup>1</sup>H NMR spectrum of compound 7

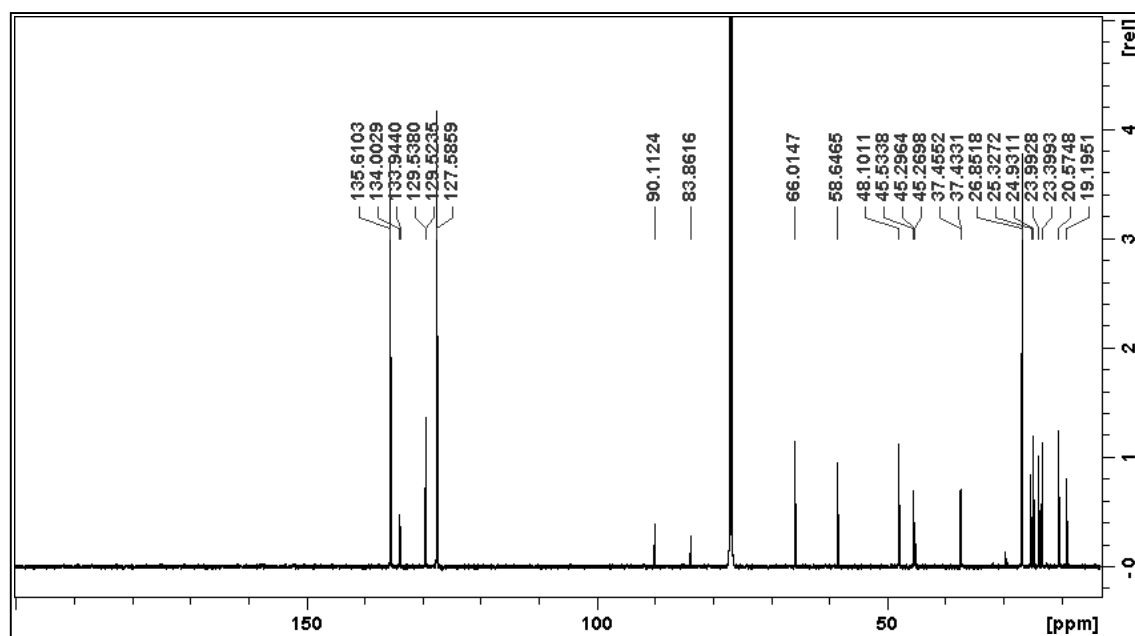

Figure S12. <sup>13</sup>C NMR spectrum of compound 7

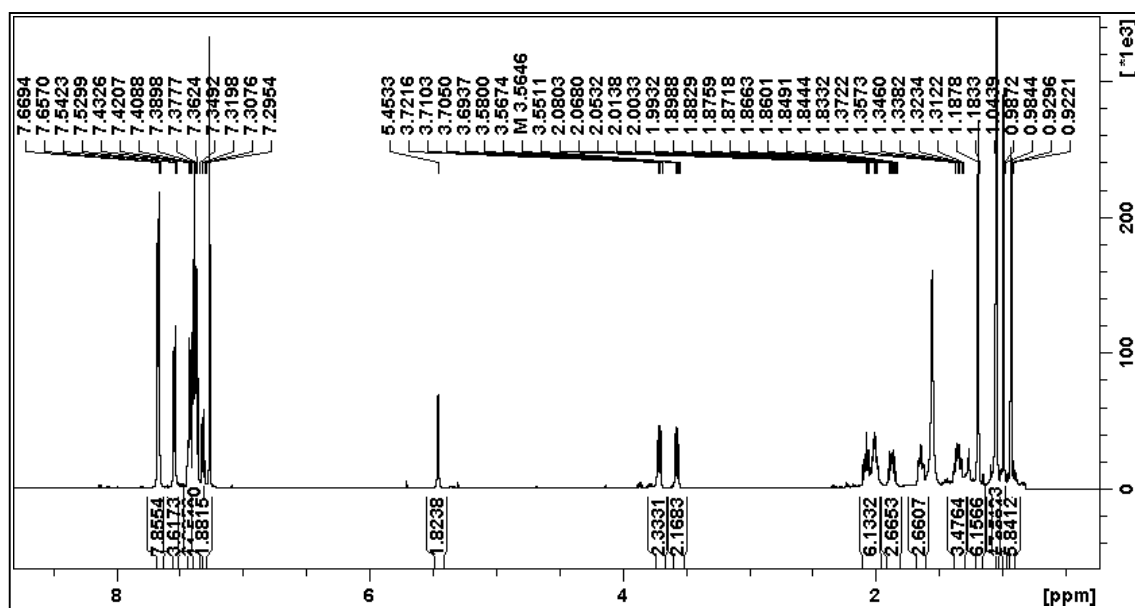

Figure S13.  $^1\text{H}$  NMR spectrum of compound 8

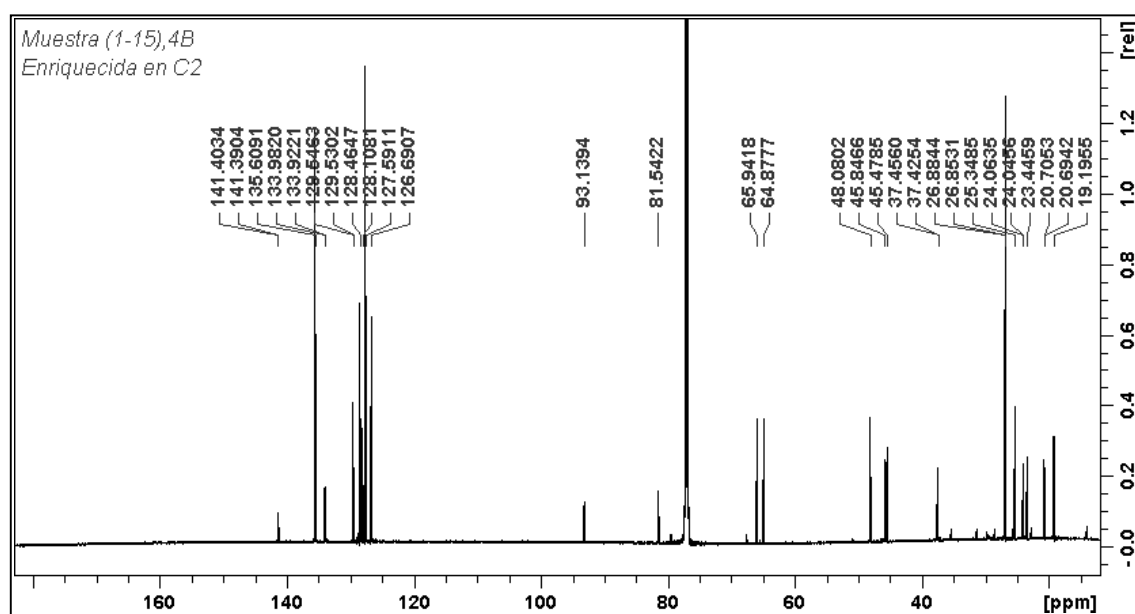

Figure S14.  $^{13}\text{C}$  NMR spectrum of compound 8



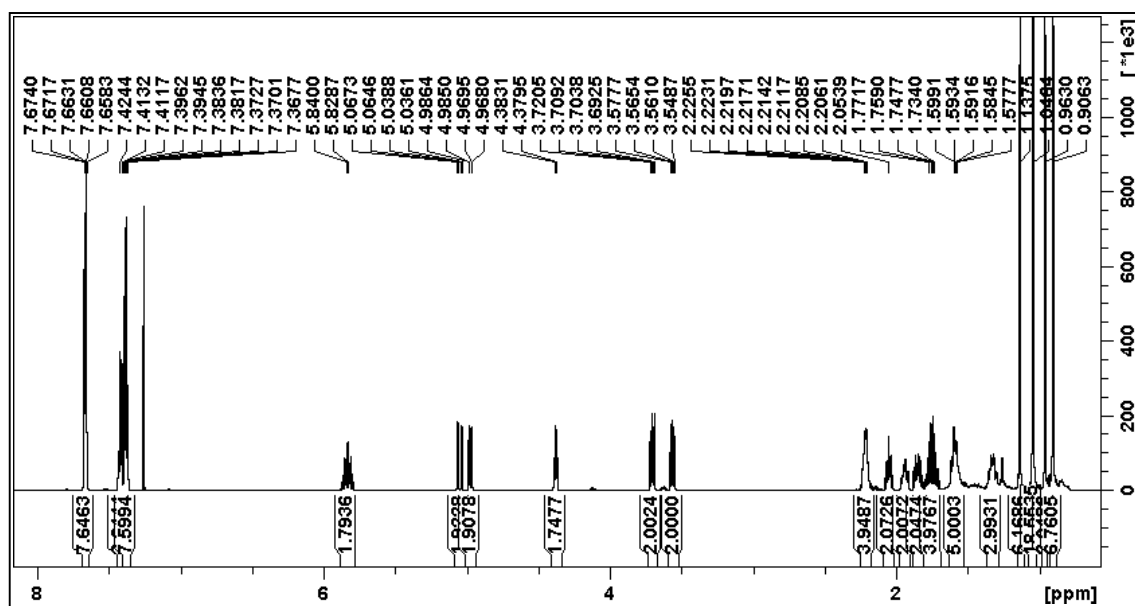

Figure S15.  $^1\text{H}$  NMR spectrum of compound 9

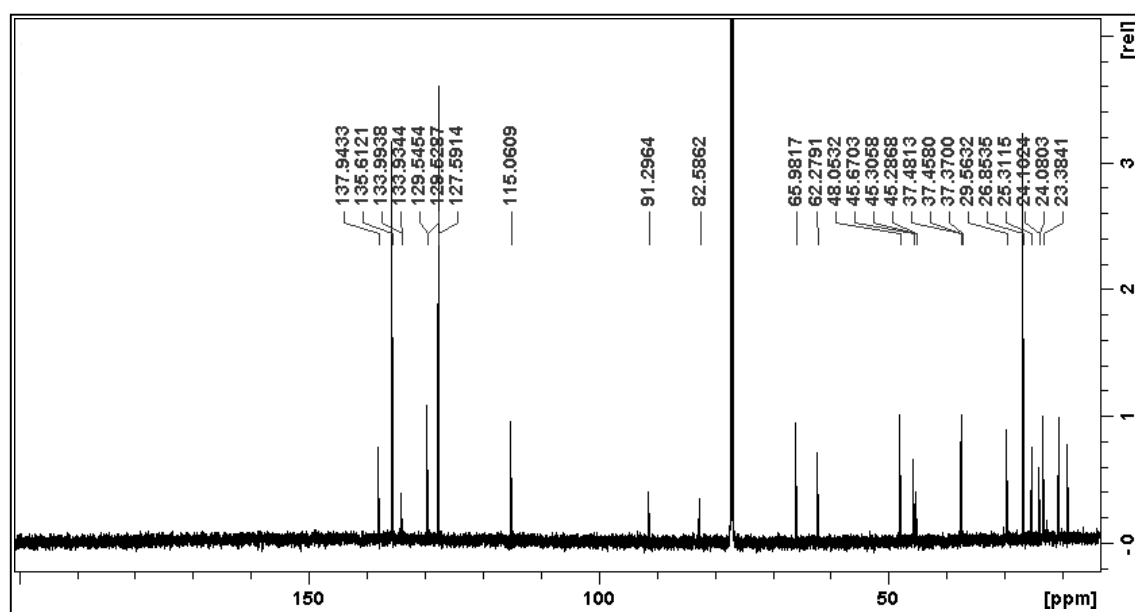

Figure S16.  $^{13}\text{C}$  NMR spectrum of compound 9

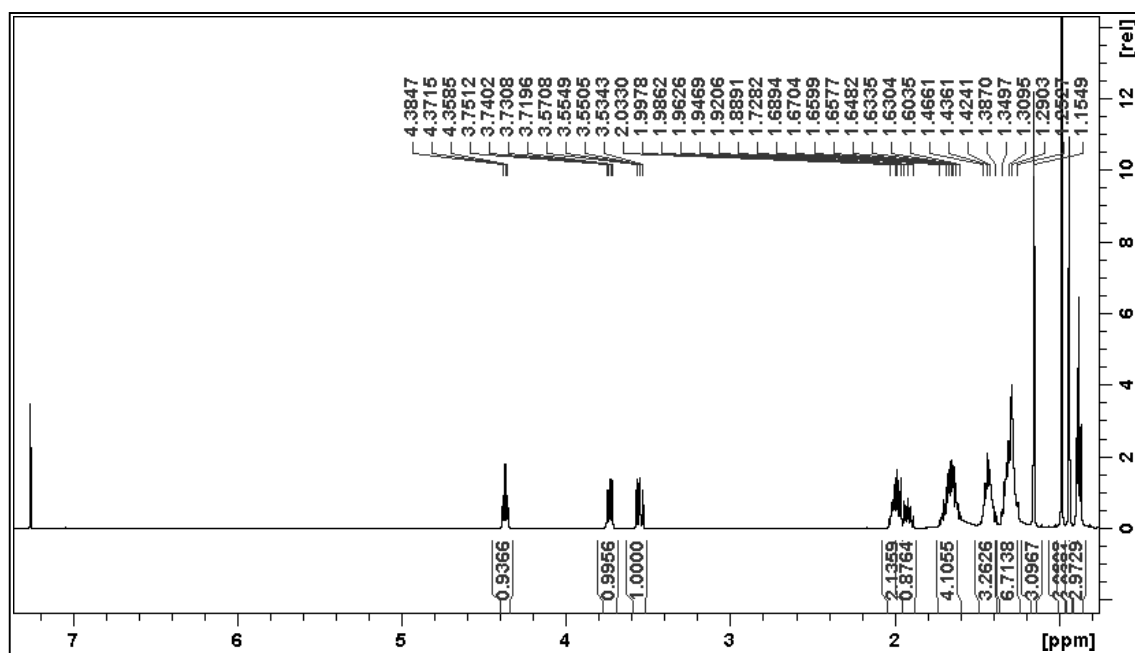

Figure S17. <sup>1</sup>H NMR spectrum of compound **10**

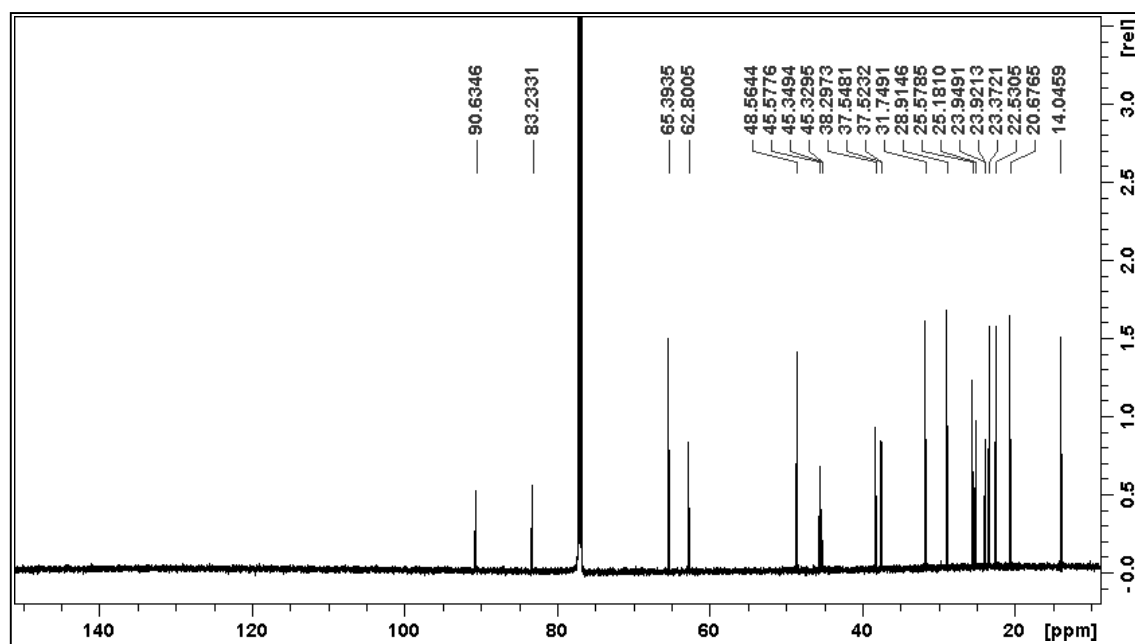

Figure S18. <sup>13</sup>C NMR spectrum of compound **10**

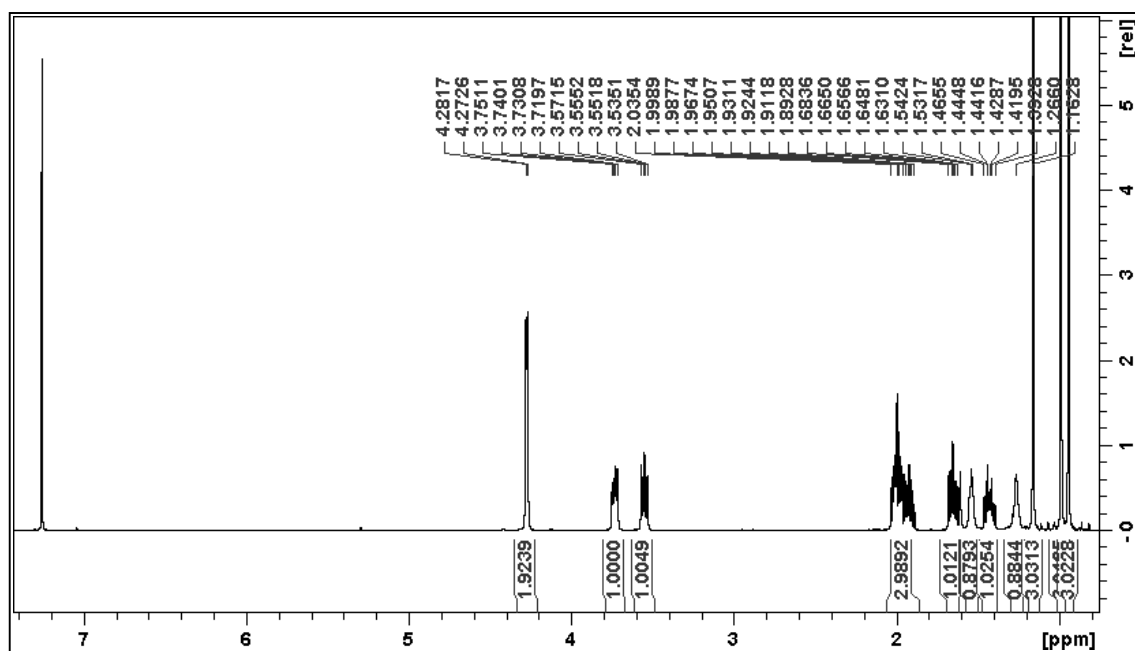

Figure S19. <sup>1</sup>H NMR spectrum of compound 11

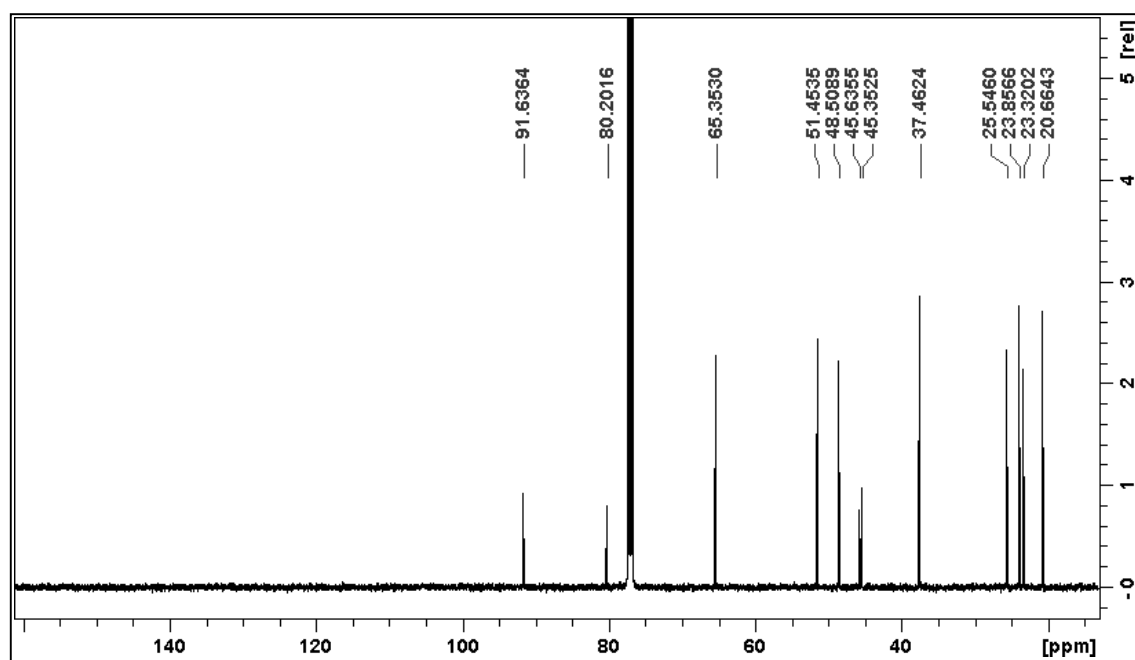

Figure S20. <sup>13</sup>C NMR spectrum of compound 11

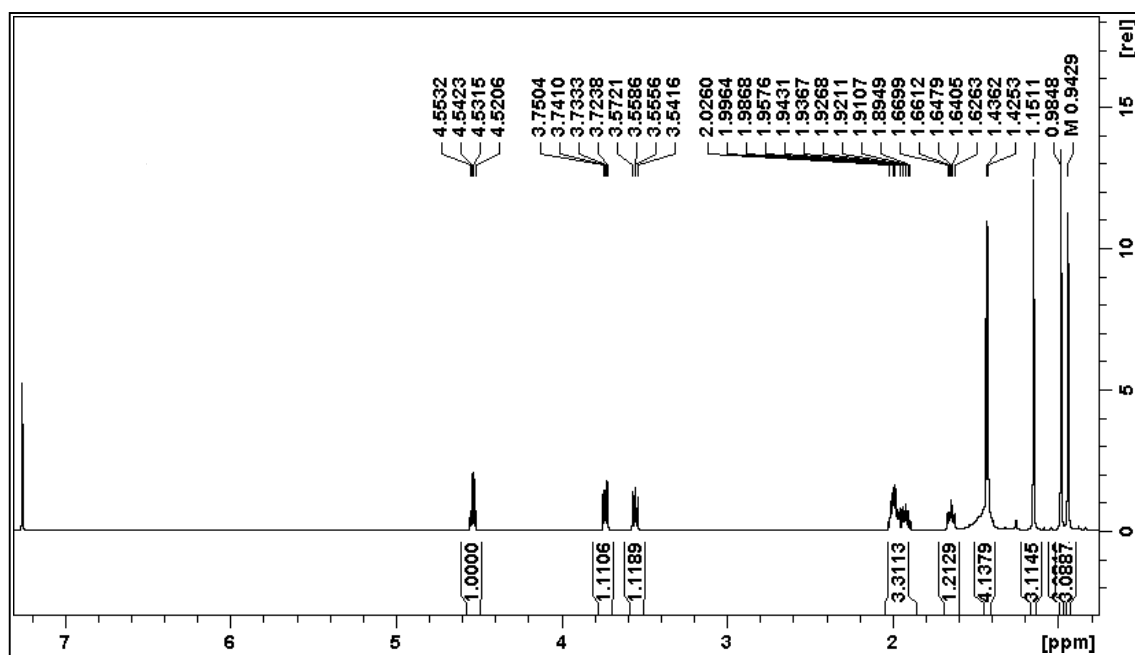

Figure S21. <sup>1</sup>H NMR spectrum of compound 12

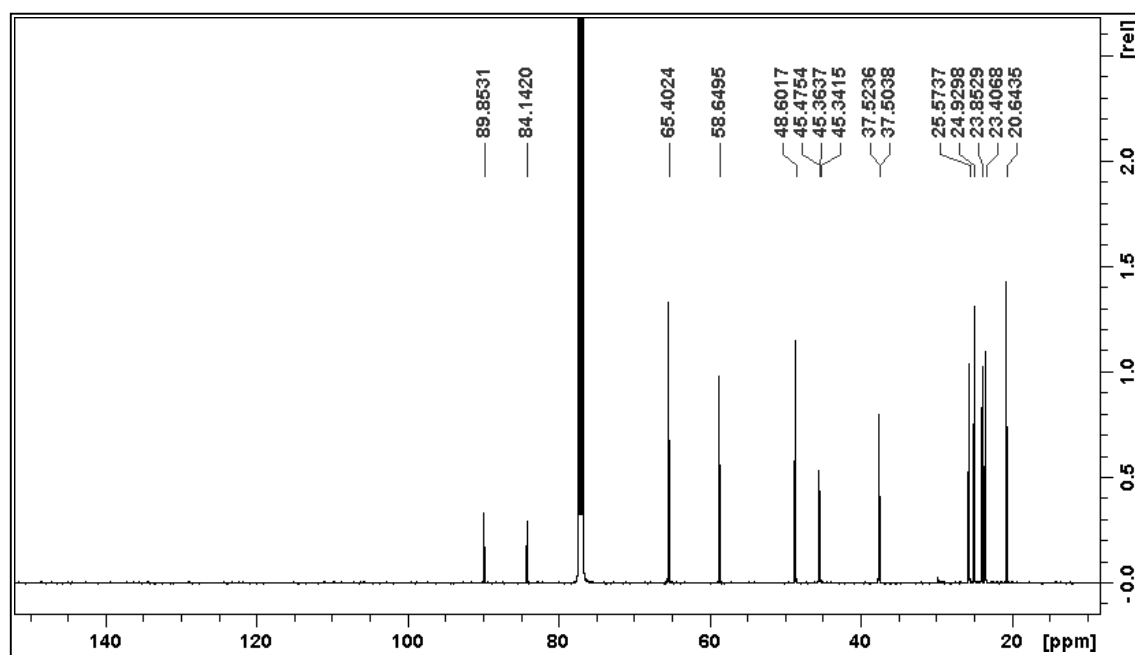

Figure S22. <sup>13</sup>C NMR spectrum of compound 12

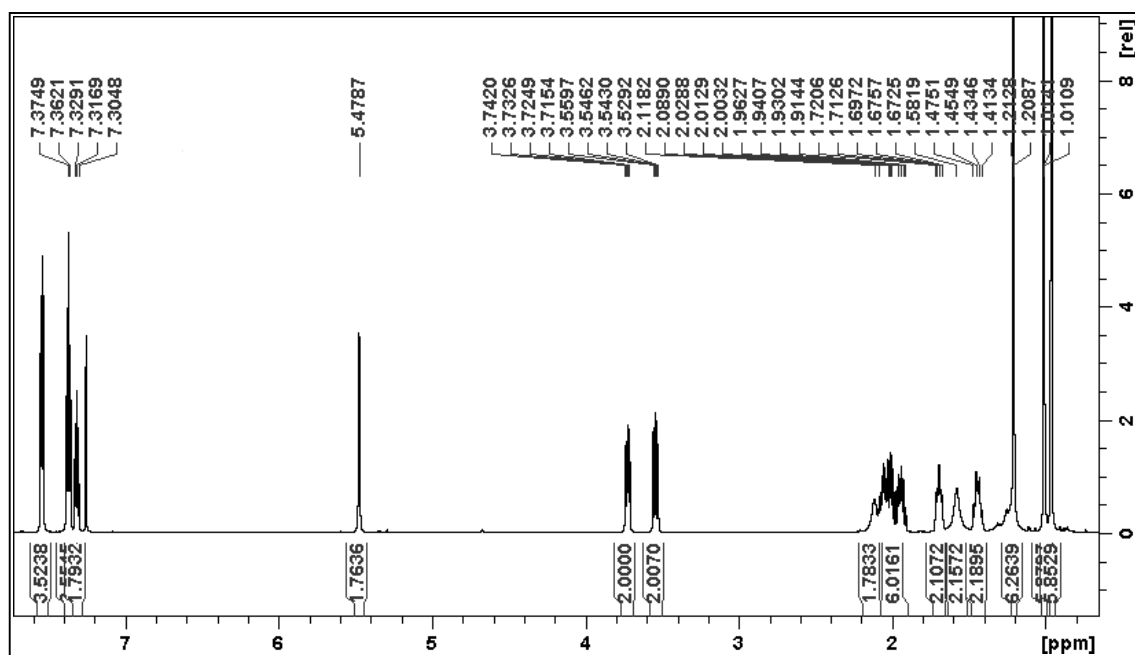

Figure S23. <sup>1</sup>H NMR spectrum of compound 13

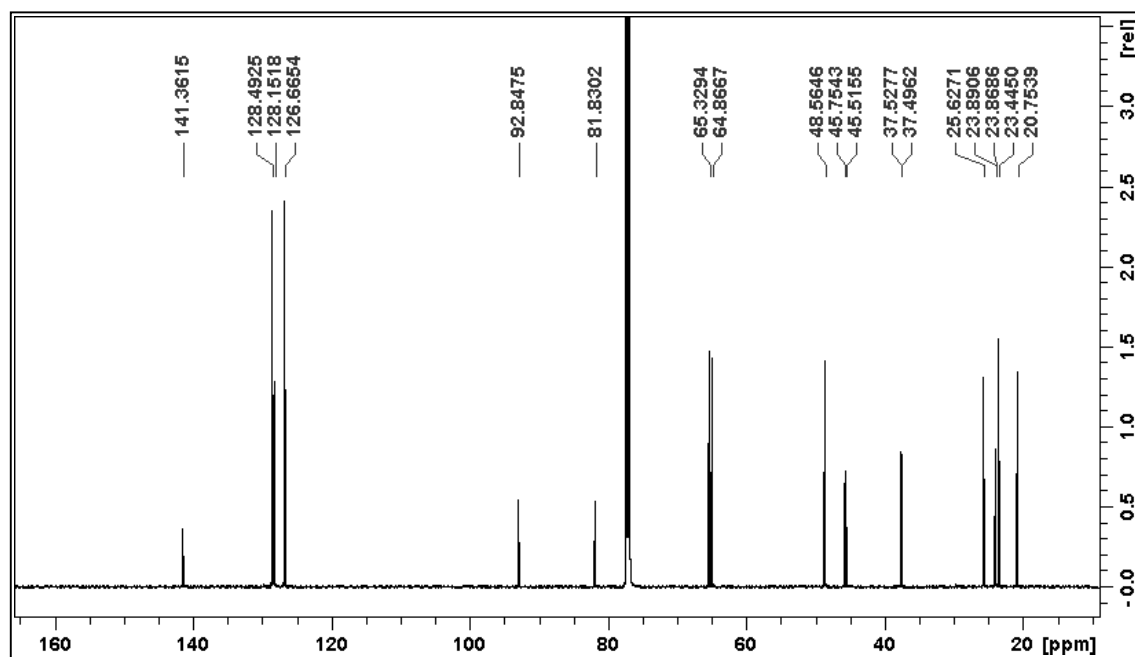

Figure S24. <sup>13</sup>C NMR spectrum of compound 13

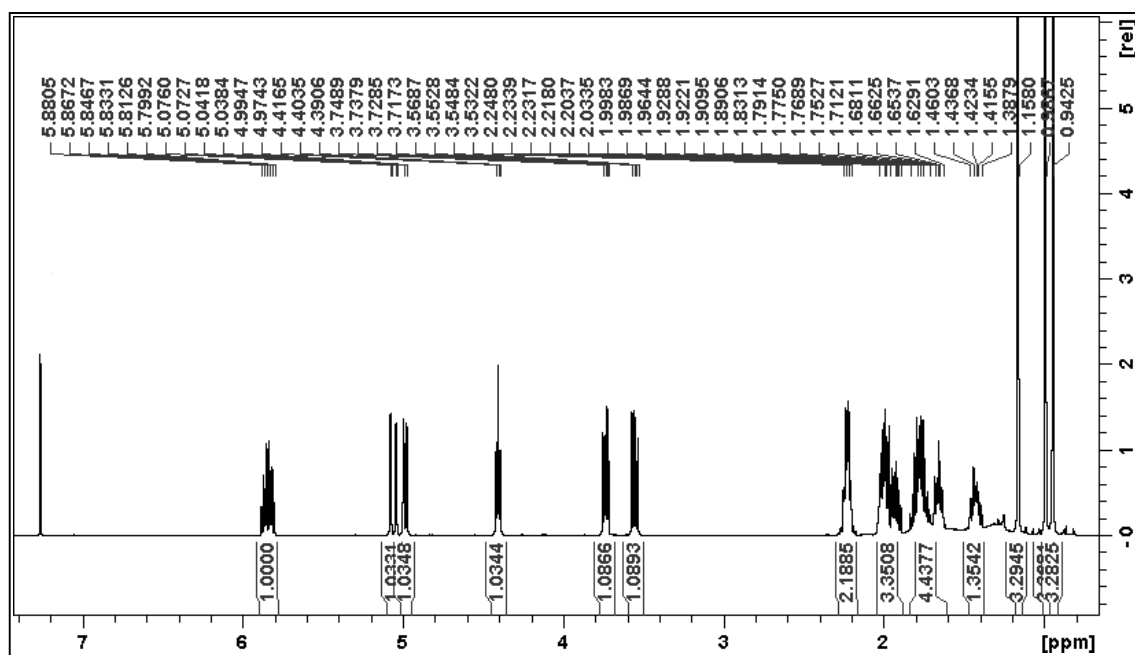

Figure S25.  $^1\text{H}$  NMR spectrum of compound **14**

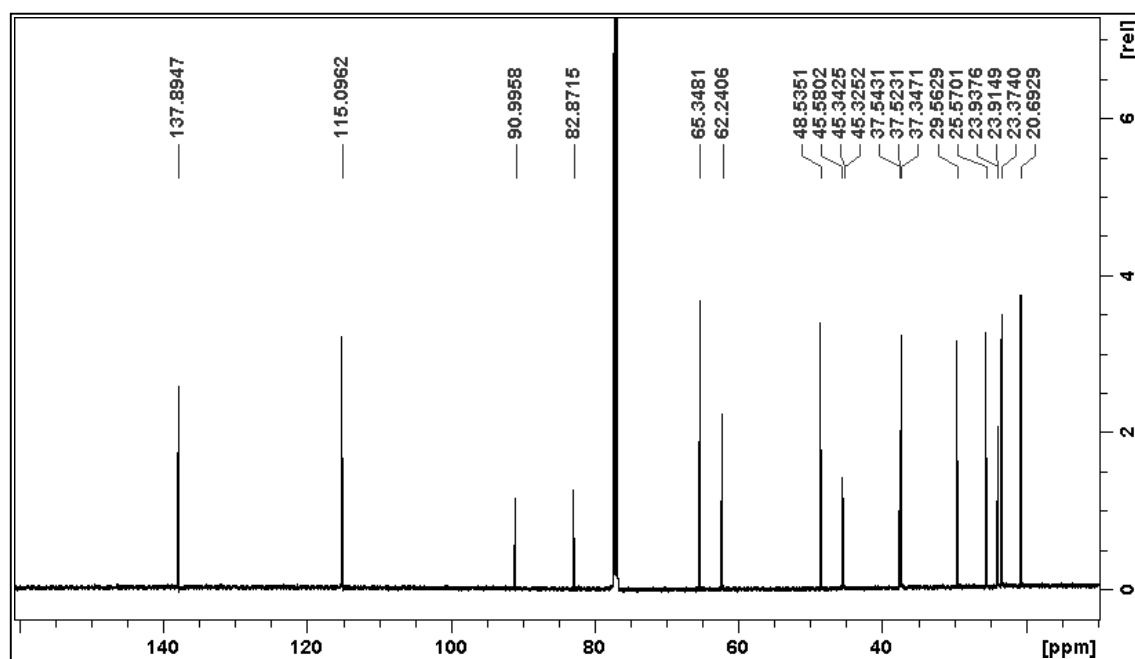

Figure S26.  $^{13}\text{C}$  NMR spectrum of compound **14**

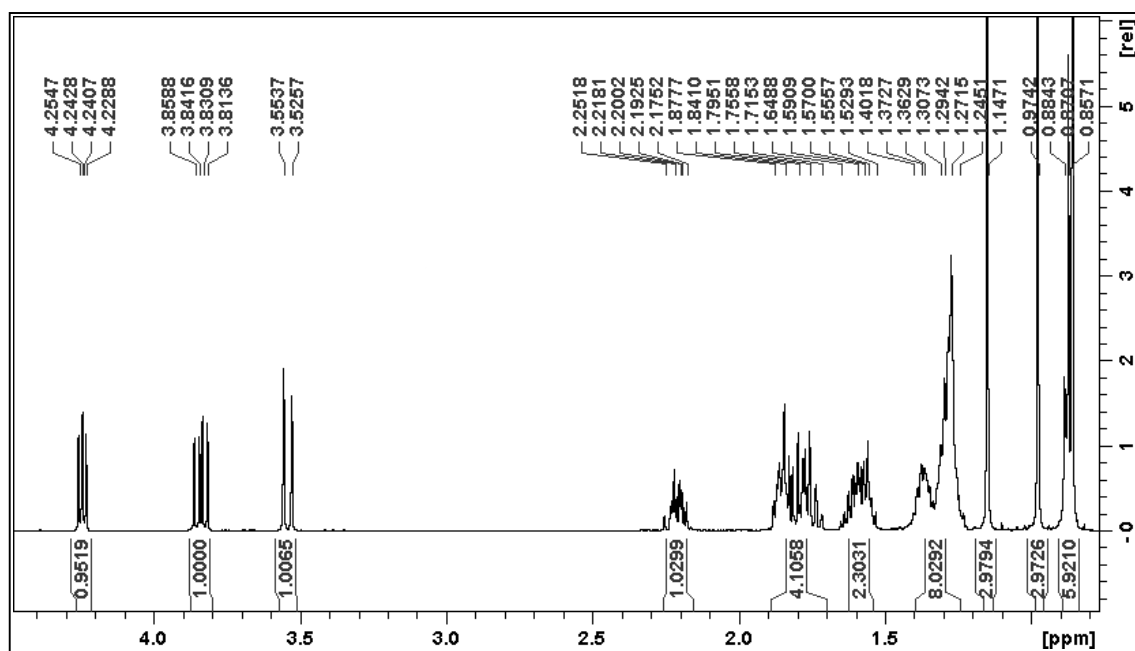

Figure S27. <sup>1</sup>H NMR spectrum of compound 1

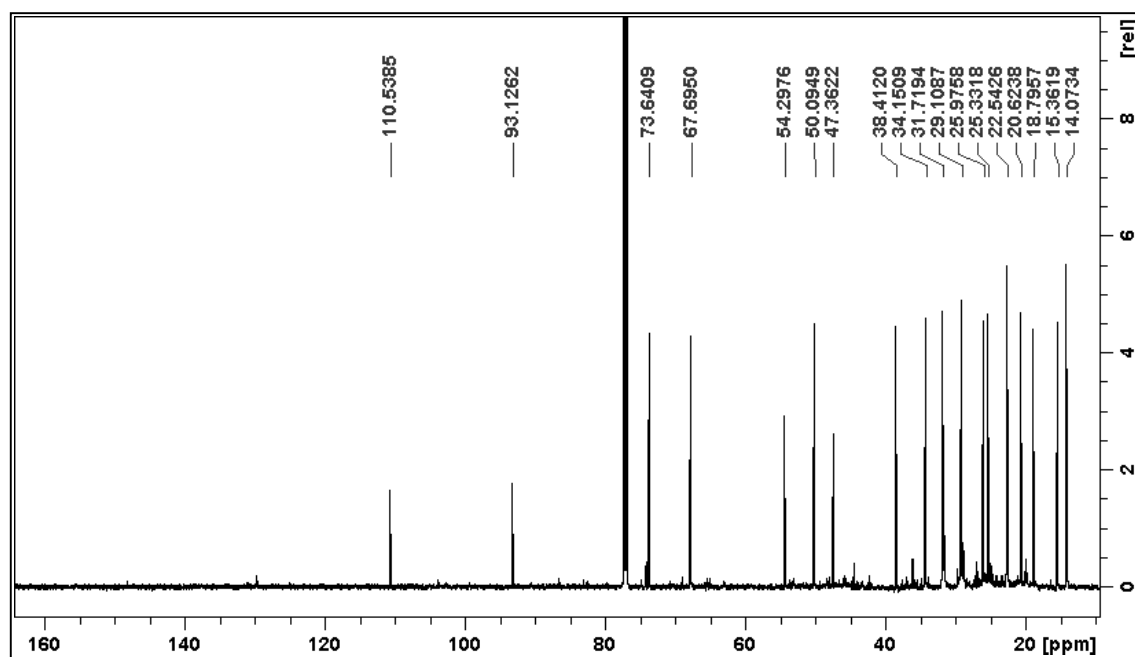

Figure S28. <sup>13</sup>C NMR spectrum of compound 1

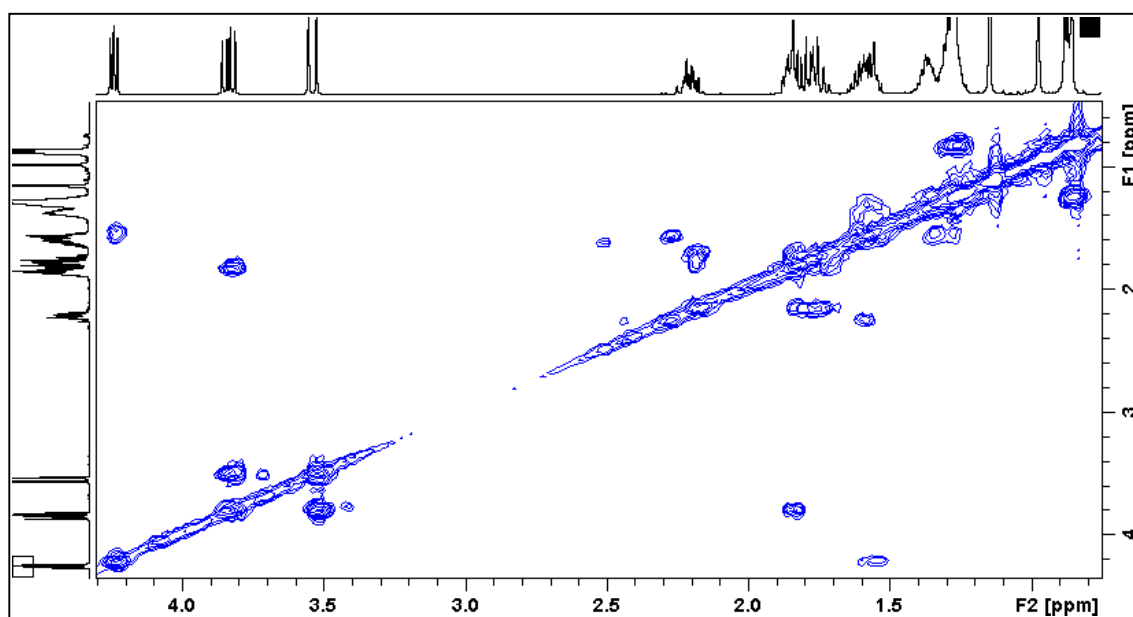

Figure S29. NMR-COSY spectrum of compound **1**

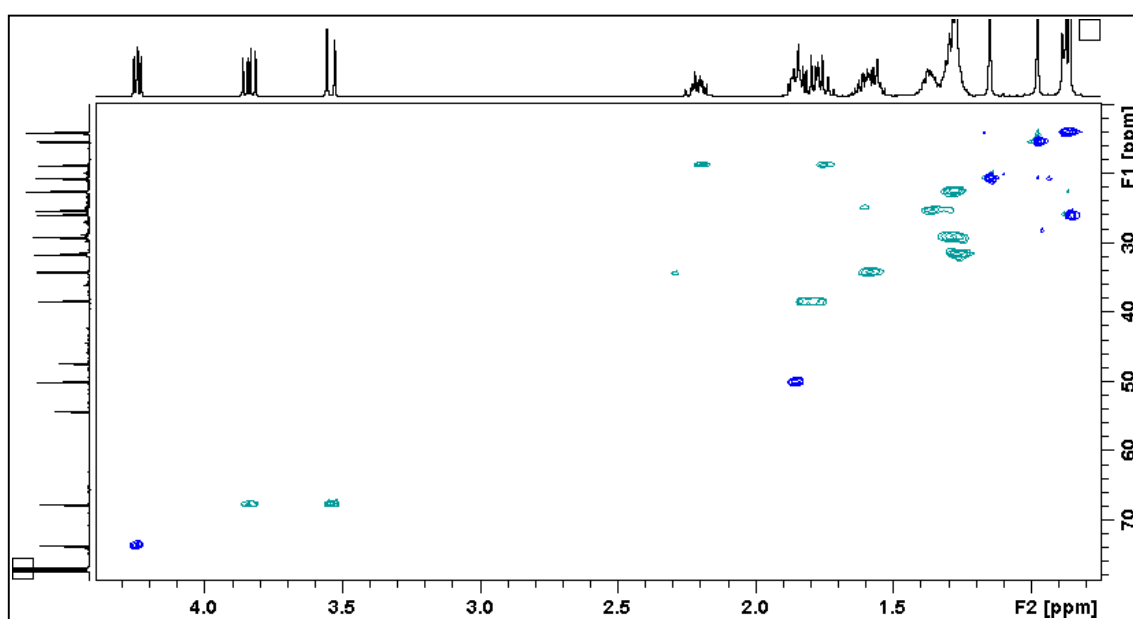

Figure S30. NMR-HSQC spectrum of compound **1**



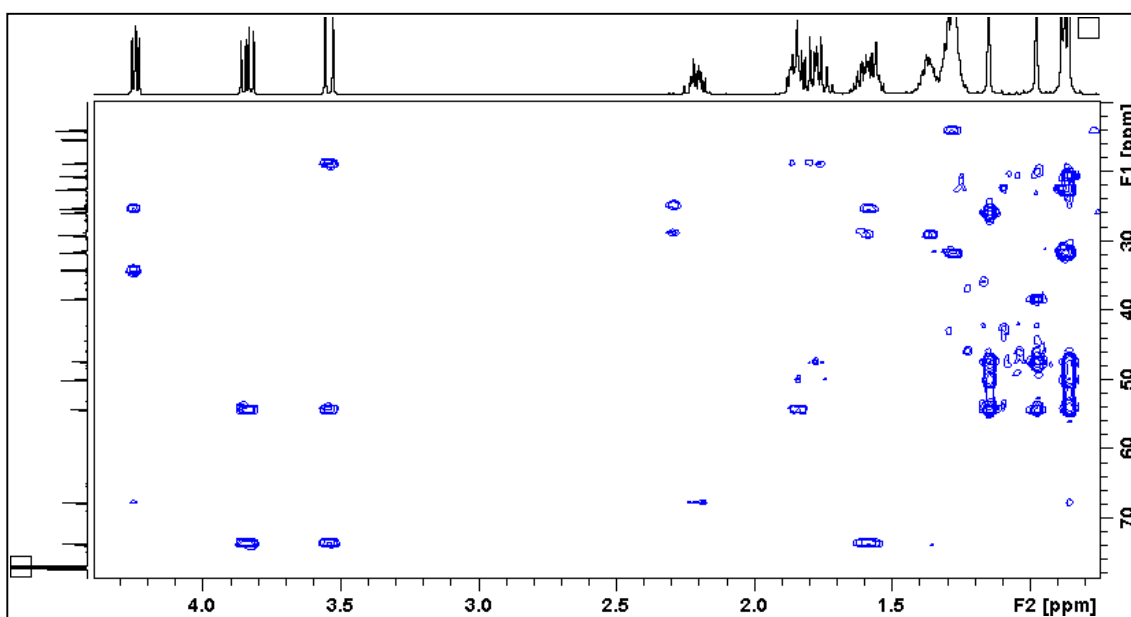

**Figure S31.** NMR-HMBC spectrum of compound **1**

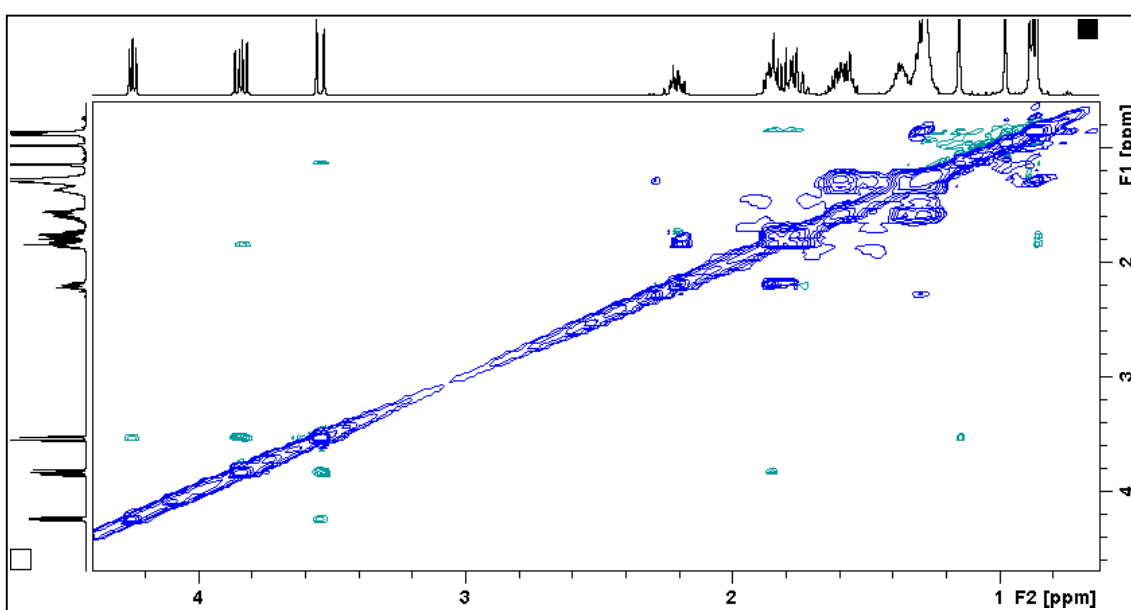

**Figure S32.** NMR-ROESY spectrum of compound **1**

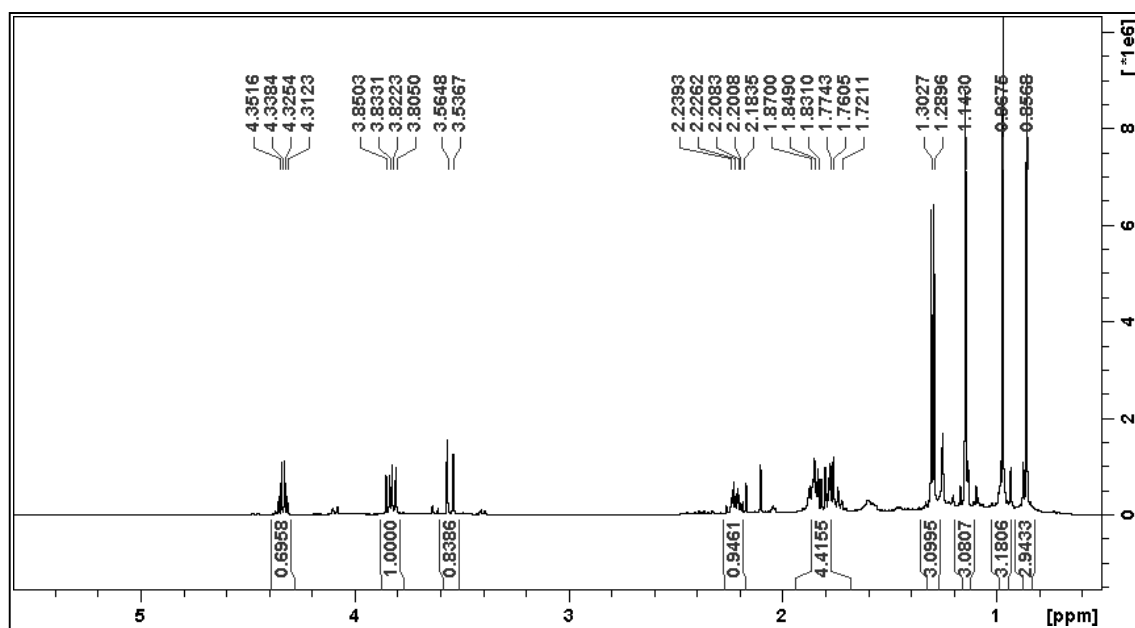

Figure S33. <sup>1</sup>H NMR spectrum of compound 21

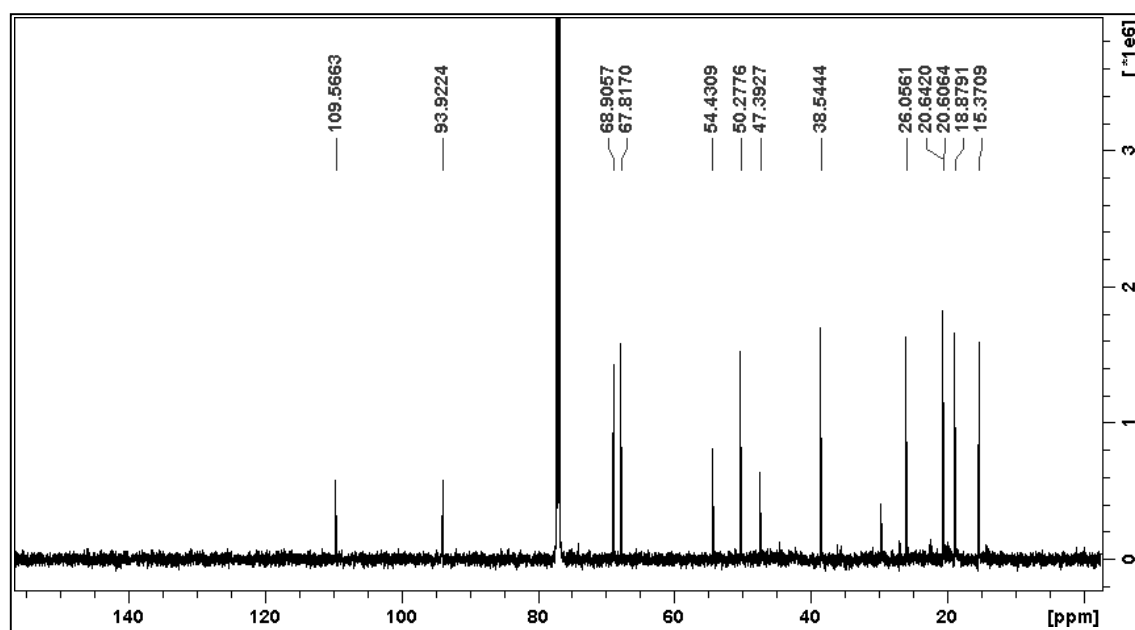

Figure S34. <sup>13</sup>C NMR spectrum of compound 21

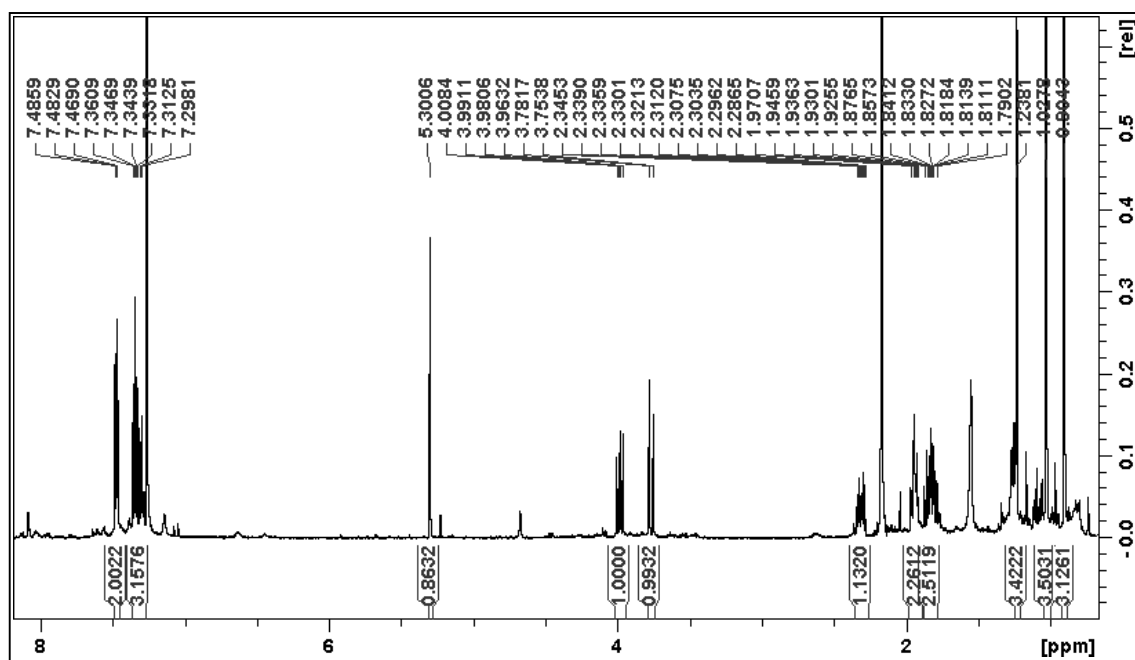

Figure S35. <sup>1</sup>H NMR spectrum of compound 22

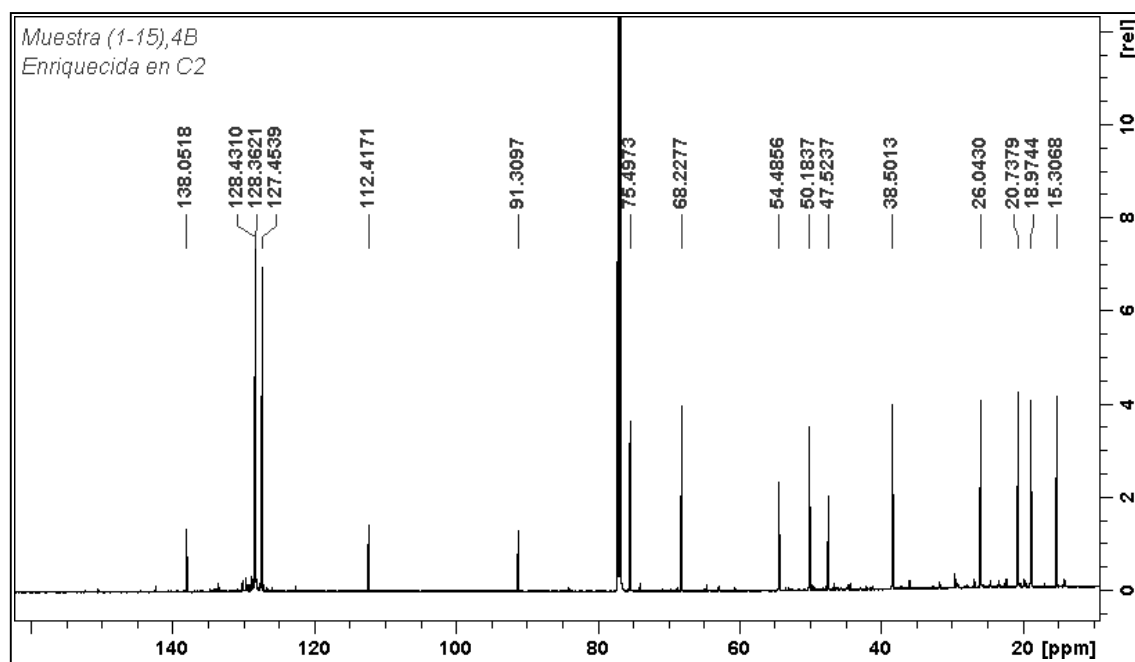

Figure S36. <sup>13</sup>C NMR spectrum of compound 22

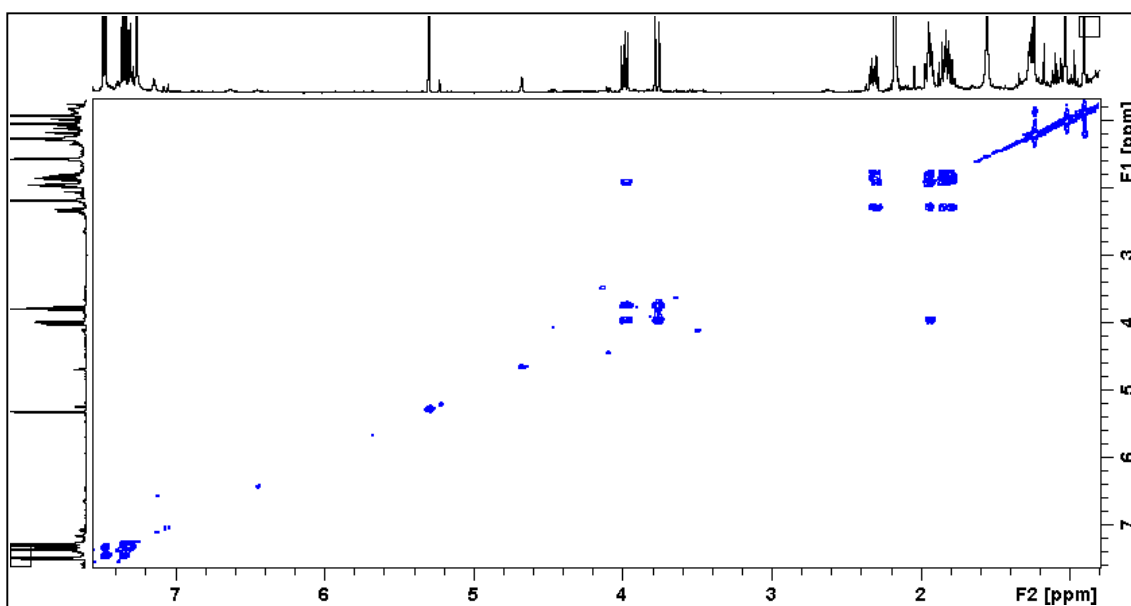

**Figure S37.** NMR-COSY spectrum of compound **22**

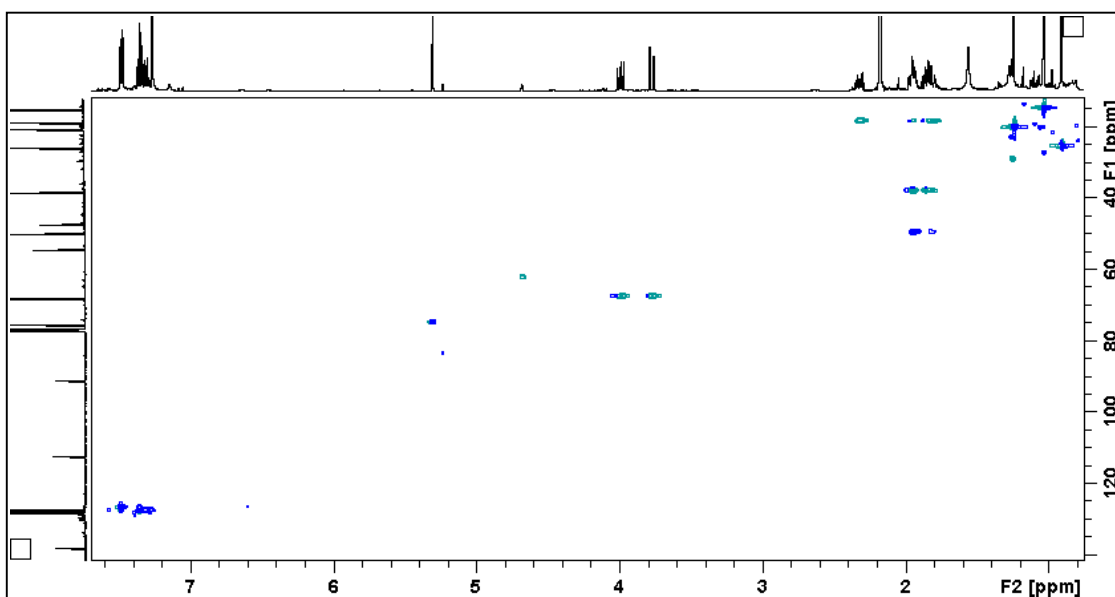

**Figure S38.** NMR-HSQC spectrum of compound **22**

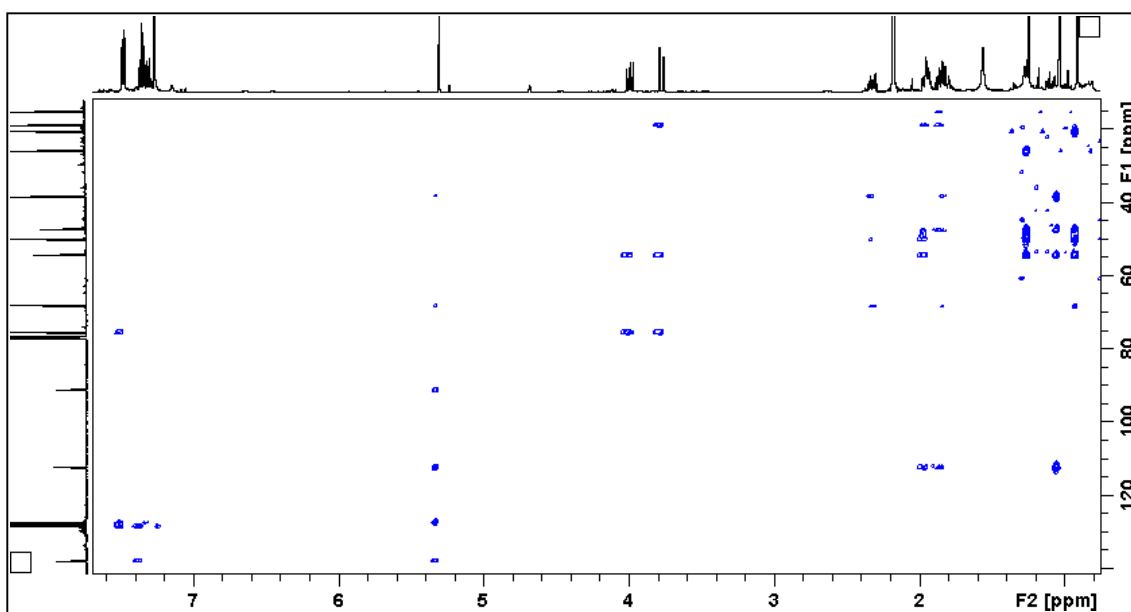

Figure S39. NMR-HMBC spectrum of compound 22

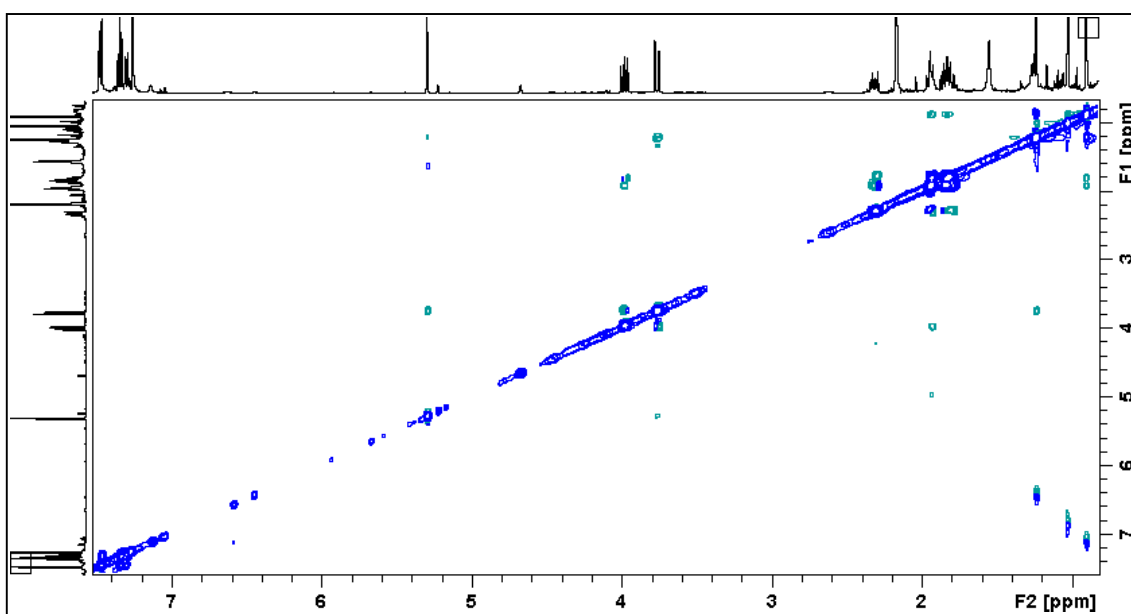

Figure S40. NMR-ROESY spectrum of compound 22

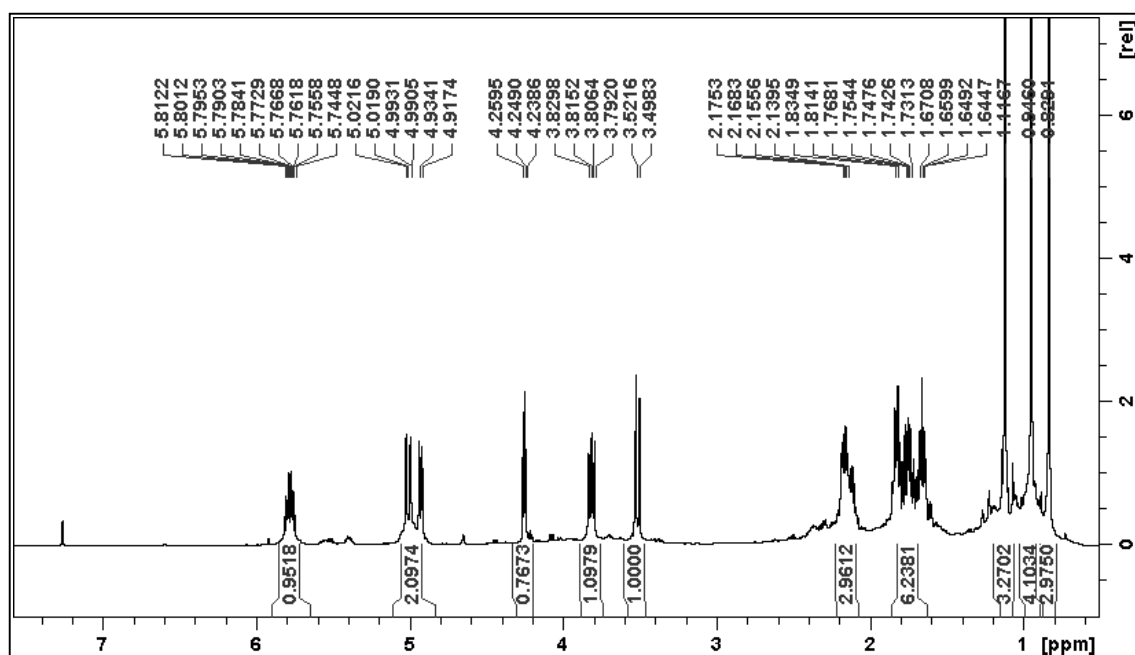

Figure S41. <sup>1</sup>H NMR spectrum of compound 23

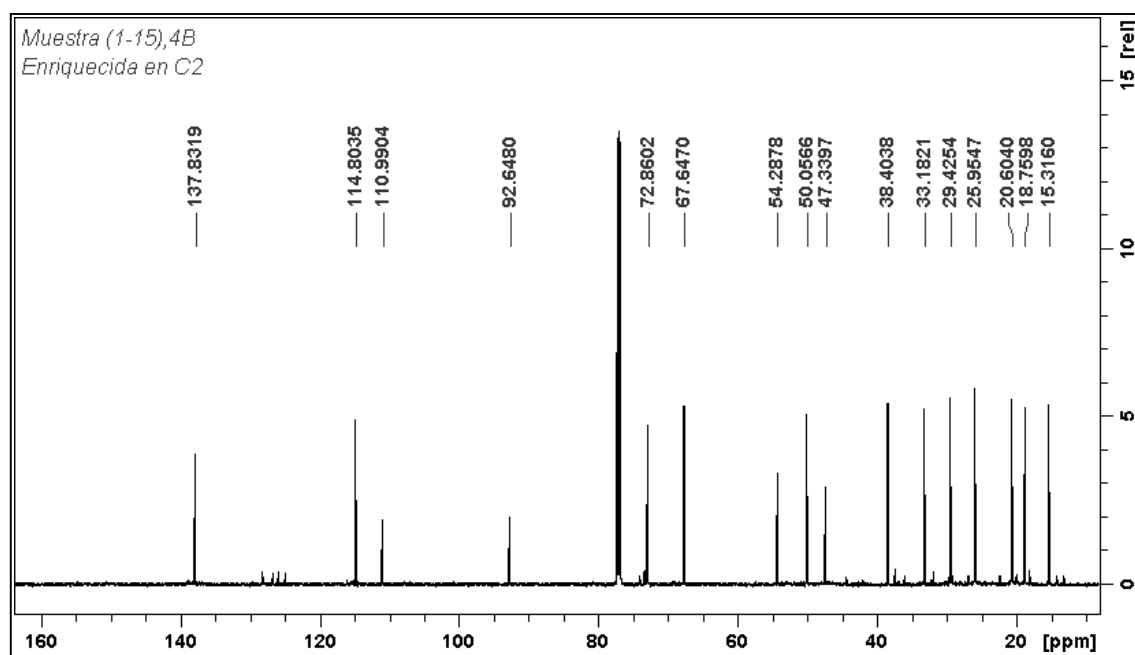

Figure S42. <sup>13</sup>C NMR spectrum of compound 23

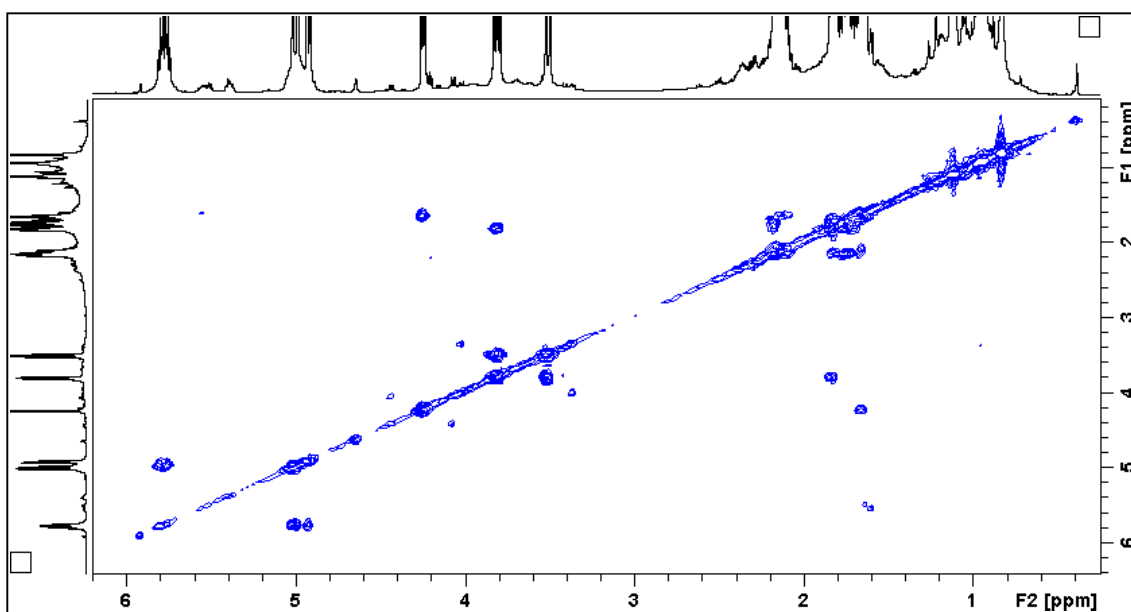

**Figure S43.** NMR-COSY spectrum of compound **23**

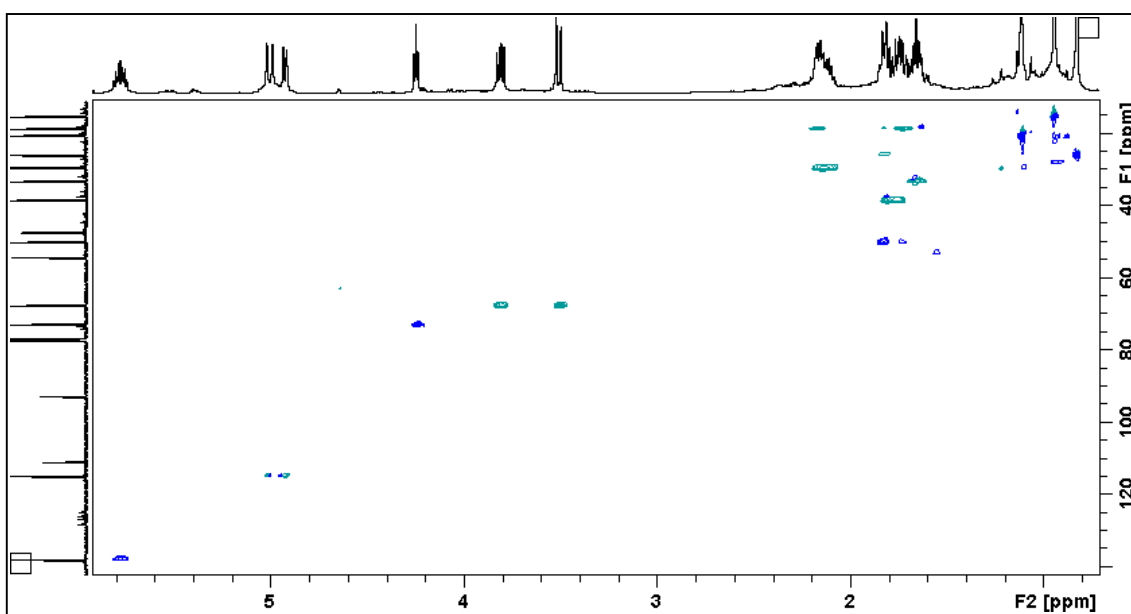

**Figure S44.** NMR-HSQC spectrum of compound **23**

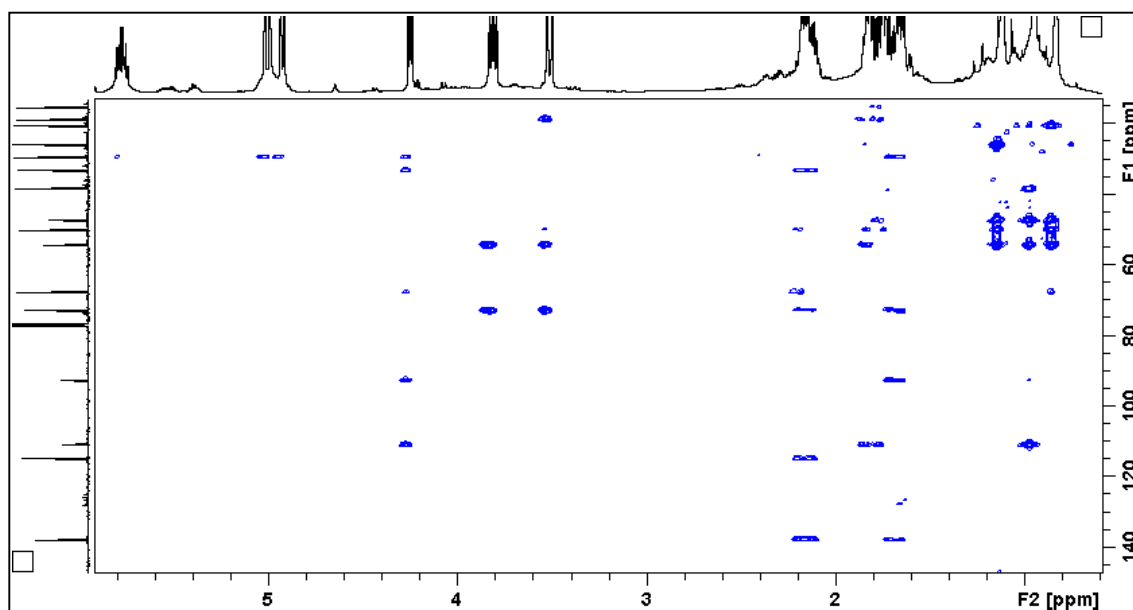

Figure S45. NMR-HMBC spectrum of compound 23

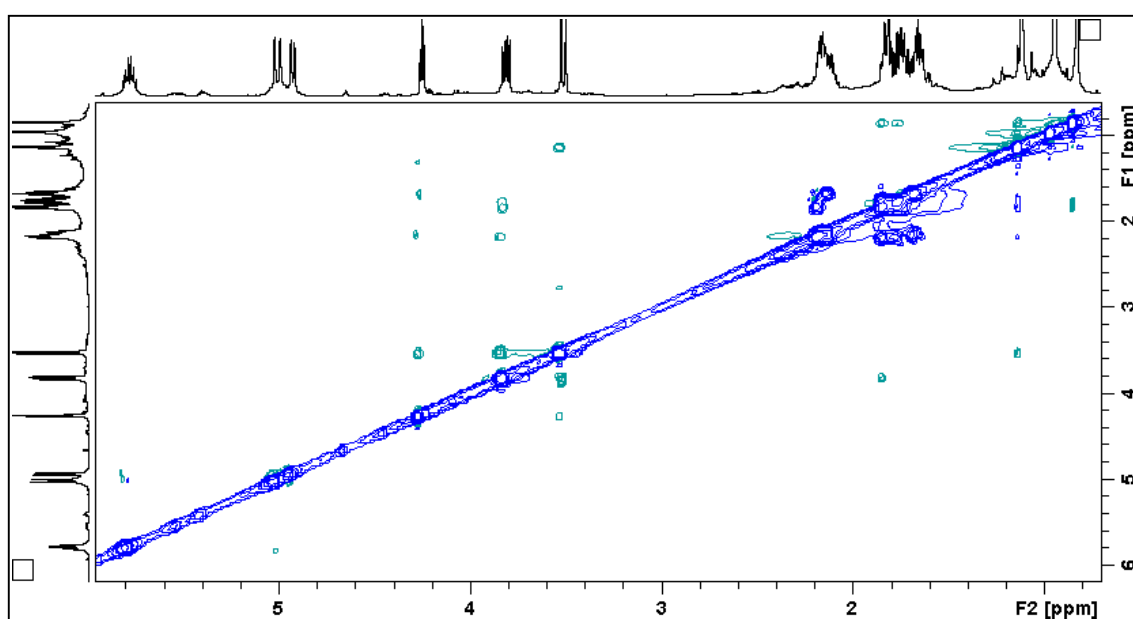

Figure S46. NMR-ROESY spectrum of compound 23



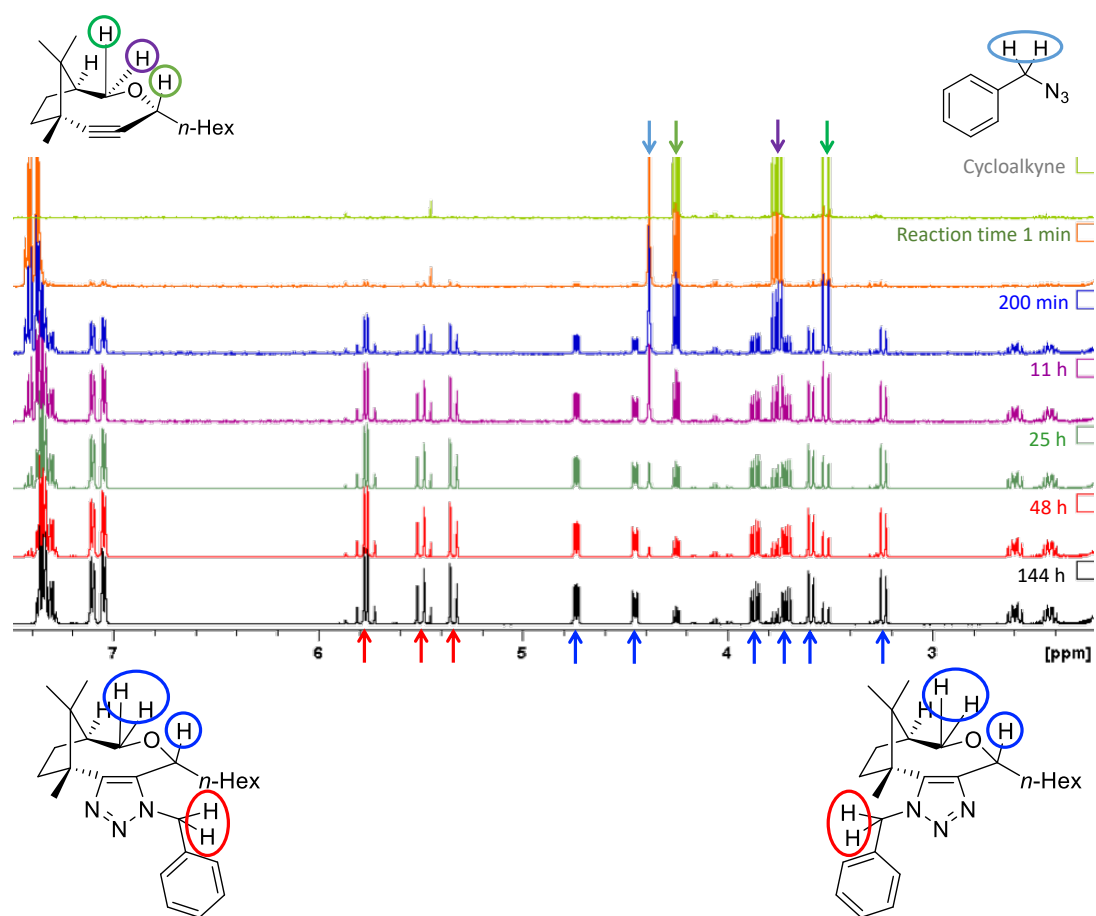

**Figure S47.** Monitoring SPAAC of cyclooctyne **1** and benzylazide by  $^1\text{H}$  NMR. The signals of the most relevant protons of each structure are indicated with colored arrows in the spectra, which match with the colored circles drawn on the structures

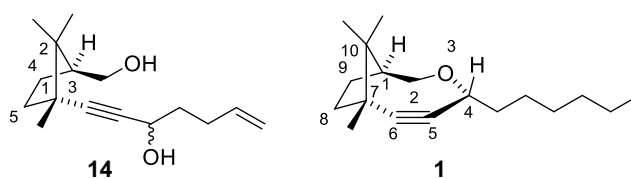

**Figure S48.** Numeration of atoms used for the nomenclature of acyclic precursors (e.g. compound **14**) and cyclic products (e.g. compound **1**)
